# Supplementary material for: A phase III randomised clinical trial of perioperative therapy (neoadjuvant chemotherapy versus chemoradiotherapy) in locally advanced gallbladder cancers (POLCAGB): study protocol
Source: PubMed Central journal article supplement — BMJ Open. 2019 Jun 27;9(6):e028147. doi: 10.1136/bmjopen-2018-028147 (PMC6609079; doi:10.1136/bmjopen-2018-028147), 2019-06-27
Supplement: bmjopen-2018-028147.draft_revisions.pdf [file bmjopen-2018-028147.draft_revisions.pdf]

# BMJ Open

BMJ Open is committed to open peer review. As part of this commitment we make the peer review history of every article we publish publicly available.

When an article is published we post the peer reviewers' comments and the authors' responses online. We also post the versions of the paper that were used during peer review. These are the versions that the peer review comments apply to.

The versions of the paper that follow are the versions that were submitted during the peer review process. They are not the versions of record or the final published versions. They should not be cited or distributed as the published version of this manuscript.

BMJ Open is an open access journal and the full, final, typeset and author-corrected version of record of the manuscript is available on our site with no access controls, subscription charges or pay-per-view fees (<http://bmjopen.bmj.com>).

If you have any questions on BMJ Open's open peer review process please email [info.bmjopen@bmj.com](mailto:info.bmjopen@bmj.com)

# BMJ Open

## A Phase III Randomized Clinical trial of Perioperative therapy (Neoadjuvant chemotherapy v/s chemoradiotherapy) in locally advanced gall bladder cancers (POLCA-GB).

|                               |                                                                                                                                                                                                                                                                                                                                                                                                                                                                                                                                                                                                                                                                                                                                                                                                                                                                                                                                                                             |
|-------------------------------|-----------------------------------------------------------------------------------------------------------------------------------------------------------------------------------------------------------------------------------------------------------------------------------------------------------------------------------------------------------------------------------------------------------------------------------------------------------------------------------------------------------------------------------------------------------------------------------------------------------------------------------------------------------------------------------------------------------------------------------------------------------------------------------------------------------------------------------------------------------------------------------------------------------------------------------------------------------------------------|
| Journal:                      | <i>BMJ Open</i>                                                                                                                                                                                                                                                                                                                                                                                                                                                                                                                                                                                                                                                                                                                                                                                                                                                                                                                                                             |
| Manuscript ID                 | bmjopen-2018-028147                                                                                                                                                                                                                                                                                                                                                                                                                                                                                                                                                                                                                                                                                                                                                                                                                                                                                                                                                         |
| Article Type:                 | Protocol                                                                                                                                                                                                                                                                                                                                                                                                                                                                                                                                                                                                                                                                                                                                                                                                                                                                                                                                                                    |
| Date Submitted by the Author: | 05-Dec-2018                                                                                                                                                                                                                                                                                                                                                                                                                                                                                                                                                                                                                                                                                                                                                                                                                                                                                                                                                                 |
| Complete List of Authors:     | Engineer, Reena; Tata Memorial Hospital, Radiation Oncology<br>Patkar, Shraddha; Tata Memorial Centre, Department of Surgical Oncology<br>Lewis, Shirley; Tata Memorial Hospital, Radiation Oncology<br>Sharma, Ashutosh; Tata Memorial Centre, radiation oncology;<br>Shetty, Nitin ; Tata Memorial Centre, Department of Radiodiagnosis<br>Ostwal, Vikas; Tata Memorial Centre, Department of Medical Oncology, GastroIntestinal Disease Management Group<br>Ramaswamy, Anant; Tata Memorial Centre, Department of Medical Oncology, Gastrointestinal Disease Management Group<br>Chopra, Supriya; ACTREC, Tata Memorial Centre, Radiation Oncology<br>Agrawal, Archi; Tata Memorial Hospital, Nuclear Medicine<br>Patil, Prachi; Tata Memorial Centre, Department of Digestive Diseases and Clinical Nutrition<br>Mehta, Shaesta; Tata Memorial Centre, Department of Digestive Diseases and Clinical Nutrition<br>Goel, Mahesh; Tata Memorial Centre, Surgical Oncology |
| Keywords:                     | Radiation oncology < RADIOTHERAPY, Hepatobiliary tumours < ONCOLOGY, Gastrointestinal tumours < ONCOLOGY, Hepatobiliary surgery < SURGERY, Clinical trials < THERAPEUTICS                                                                                                                                                                                                                                                                                                                                                                                                                                                                                                                                                                                                                                                                                                                                                                                                   |
|                               |                                                                                                                                                                                                                                                                                                                                                                                                                                                                                                                                                                                                                                                                                                                                                                                                                                                                                                                                                                             |

SCHOLARONE™  
Manuscripts

**Title page****A Phase III Randomized Clinical trial of Perioperative therapy (Neoadjuvant chemotherapy v/s chemoradiotherapy) in locally advanced gall bladder cancers (POLCAGB).**

Reena Engineer<sup>1</sup>, Shraddha Patkar<sup>2</sup>, Shirley Lewis<sup>1</sup>, Ashutosh Das Sharma<sup>1</sup>, Nitin Shetty<sup>3</sup>, Vikas Ostwal<sup>4</sup>, Anant Ramaswamy<sup>4</sup>, Supriya Chopra<sup>5</sup>, Archi Agrawal<sup>6</sup>, Prachi Patil<sup>7</sup>, Shaesta Mehta<sup>7</sup>, Mahesh Goel<sup>2</sup>

1- Department of Radiation Oncology, Tata Memorial Hospital, Mumbai, India

2- Department of Surgical Oncology, Tata Memorial Hospital, Mumbai, India

3- Department of Radiodiagnosis, Tata Memorial Hospital, Mumbai, India

4- Department of Medical Oncology, Tata Memorial Hospital, Mumbai, India

5- Department of Radiation Oncology, ACTREC, Tata Memorial Centre, Mumbai, India

6- Department of Nuclear Medicine, Tata Memorial Hospital, Mumbai, India

7- Department of Digestive Diseases and Clinical Nutrition, Tata Memorial Hospital, Mumbai, India

**Corresponding author** Reena Engineer

Room no. 322

Tata Memorial Hospital

Dr.E. Borgese Road

Lower Parel

Mumbai, MH

India

+912224177000(ext-7165)

[Email-reena.engineer@gmail.com](mailto:reena.engineer@gmail.com)

**Key words:** Radiation oncology, Hepatobiliary tumours, Gastrointestinal tumours, Hepatobiliary surgery, Clinical trials

**Running Title:** Perioperative therapy in Locally Advanced GBC, A phase 3 RCT

**Word Count:** 3157

## Main Document

**A Phase III Randomized Clinical trial of Perioperative therapy (Neoadjuvant chemotherapy v/s chemoradiotherapy) in locally advanced gall bladder cancers (POLCA-GB).**

### **ABSTRACT**

#### **Introduction:**

Neoadjuvant chemotherapy is considered the current standard for locally advanced gallbladder cancer. There is no consensus on the optimal neoadjuvant approach. A pilot study from our institution has shown improved overall survival and progression free survival with neoadjuvant chemoradiation. The present randomized phase 3 trial is designed to compare neoadjuvant chemoradiation with neoadjuvant chemotherapy alone and will test the superiority of chemoradiation in terms of tumor downstaging and improvement in overall survival.

#### **Methods and analysis:**

Patients with locally advanced gallbladder cancer (T3-4) with predefined clinic-radiological features will be randomized to gemcitabine-based chemotherapy alone arm or chemoradiation arm. Patients with resectable disease or with distant metastases will be excluded. The primary end point of the study is to compare overall survival between the two arms. The secondary end points are to compare progression free survival, R0 resection rates, acute and late toxicity, postoperative complications, and quality of life between two study arms. The trial is designed to detect an improvement in median overall survival by 5.5 months in the study arm (11 months in control group; Hazard ratio of 0.7) with 80.0% power at a 0.05 significance level. The resultant sample size to achieve this aim is 314 (157 in each arm) over a duration of 5 years with a 10% attrition rate.

#### **Ethics and Dissemination:**

The institutional ethics committee has approved this trial and will be routinely monitoring the trial at frequent intervals. The results of the study will be disseminated via peer reviewed scientific journals, conference presentations and submission to regulatory authorities.

#### **Registration:**

1  
2  
3 The trial is registered with Clinical Trials Registry India (CTRI/2016/08/007199) and clinical  
4 trial.gov (NCT).  
5  
6

7 **Article summary:**  
8

9 **Article focus:**  
10

11 -Does neoadjuvant chemoradiation in locally advanced gallbladder cancer improve overall  
12 survival?  
13

14 -Will neoadjuvant chemoradiation achieve downstaging and facilitate R0 resection?  
15  
16

17 **Key Messages:**  
18

19 -This trial aims to assess the superiority of neoadjuvant chemoradiation over neoadjuvant  
20 chemotherapy in locally advanced gallbladder cancers in terms of improvement in overall  
21 survival.  
22  
23

24 -The results of this study will define the optimal neoadjuvant approach in locally advanced  
25 gallbladder cancer.  
26  
27

28 **Strengths and limitations of the study:**  
29

30 Strengths of this study are:  
31

32 1-This is the first randomized study evaluating chemoradiation in the neoadjuvant setting.  
33

34 2-Treatment of locally advanced GBC is not standardized and this trial will give an opportunity  
35 to do so.  
36  
37

38 The limitations of this study are:  
39

40 1-Slower recruitment of patients- As majority of patients with GBC in population present late in  
41 the course of the disease, a large fraction of the screened patients turn out to be metastatic or  
42 with advanced disease that do not meet the stringent inclusion criteria for the trial. This has  
43 resulted in low enrolment into the study.  
44  
45

46 2-Compliance of patients- The long treatment time (>6 months)combined with the  
47 socioeconomic restrictions of the majority of the population makes it challenging for the patients  
48  
49  
50  
51

1  
2  
3 to stick to the advised care resulting in financial burden and subsequently increased susceptibility  
4 of drop out and loss of follow up.  
5  
6

7 3-As the treatment is decided and delivered by a large team of physicians that consists of  
8 radiologists, gastroenterologist, oncosurgeons, medical oncologists and radiation oncologists, the  
9 coordination of the team becomes challenging.  
10  
11  
12  
13  
14  
15  
16  
17

## 18 **Introduction**

19  
20 Gallbladder cancer (GBC) is the most common malignancy of the biliary tract <sup>[1]</sup>. Its incidence is  
21 alarmingly high in Chile, Japan, and northern India <sup>[2]</sup>. Complete surgical excision is the standard  
22 of care for early stage GBC. Unfortunately, majority of the cases are diagnosed at an advanced or  
23 metastatic stage and only 10–30% of the patient present with resectable disease <sup>[2]</sup>.  
24  
25  
26  
27

28 GBC with liver infiltration, with or without visceral/vascular infiltration, or having large local  
29 lymph node metastases in the absence of distant metastases are generally considered as locally  
30 advanced. Prognosis for locally advanced disease in terms of resectability and survival remains  
31 dismal in most of the reports <sup>[3]</sup>. Even with aggressive surgery like extrahepatic bile duct  
32 resection or pancreaticoduodenectomy, the 5-year survival rate for stage III disease at best ranges  
33 from 30% to 42%. These results are often not reproducible in routine clinical practice <sup>[4-9]</sup>.  
34  
35  
36  
37  
38

39 Locally advanced GBC, where surgery is not possible, are treated with chemotherapy alone as  
40 the current standard of care. In ABC02 trial by Valle et al, neoadjuvant chemotherapy (NACT)  
41 with gemcitabine and cisplatin was found to be superior to gemcitabine alone in terms of local  
42 tumor response <sup>[10]</sup>. Some locally advanced non-metastatic GBC do get down-staged to undergo  
43 resection following NACT. In a publication from our institute, gemcitabine/cisplatin based  
44 NACT alone resulted in R0 resection rate of 46% and median overall survival (OS) and  
45 progression free survival (PFS) of 13.4 months and 8.1 months respectively <sup>[11]</sup>.  
46  
47  
48  
49  
50  
51

52 Few studies have reported the outcomes of neoadjuvant chemoradiation (NACRT) with limited  
53 success <sup>[12-13]</sup>. In an earlier report, we published the outcomes of 3 patients with unresectable  
54 tumors, 2 of which were down staged to undergo R0 resection with high dose NACRT <sup>[14]</sup>. In a  
55  
56  
57  
58  
59  
60

1  
2  
3 pilot study of 28 patients conducted at our center, treated with NACRT, 47% of the patients  
4 underwent R0 resections with median OS and PFS being 35 and 20 months respectively [15].  
5  
6

7 There is no consensus on the optimal neoadjuvant approach in locally advanced GBCA.  
8 However, most of the treating physicians prefer to use NACT alone followed by surgical  
9 resection if down staging is achieved. The present randomized trial is designed to compare  
10 NACRT against NACT alone and will test the superiority of one over the other in terms of down  
11 staging and prolonging survival.  
12  
13  
14  
15

## 16 **Methods and analysis**

### 17 **Hypothesis**

18  
19  
20 On the basis of encouraging results obtained with NACRT, we hypothesize that NACRT and  
21 additional chemotherapy will improve OS compared to NACT alone in locally advanced GBCA.  
22  
23  
24  
25

### 26 **Study aim**

27  
28 The primary aim of the study is to compare the OS between the patients treated with NACT  
29 alone vs NACRT. The secondary aims are to compare the R0 surgical resection rate, PFS, acute  
30 and late toxicity, postoperative complications, and quality of life between two study arms.  
31  
32  
33  
34

### 35 **Study Design**

36  
37 This study is a Phase III randomized control trial designed to compare the OS between the two  
38 neoadjuvant treatment arms. All patients with diagnosis of non-metastatic locally advanced  
39 GBCA who fulfill the study eligibility criteria will be evaluated for participation in the study.  
40 Patients will undergo upfront randomization into one of the study arms (neoadjuvant  
41 chemotherapy or chemoradiation) using permuted block stratified randomization. Stratification  
42 will be done according the T stage (T1-4). All randomization will be done through clinical  
43 research secretariat (CRS) at Tata Memorial Hospital (TMH).  
44  
45  
46  
47  
48  
49

### 50 **Research Setting**

51  
52 The study will be conducted at TMH, Tata Memorial Centre(TMC), and Advanced Centre for  
53 Treatment Research and Education(ACTREC), Mumbai, India and other collaborating centers.  
54  
55  
56  
57  
58  
59  
60

## Patients and Public Involvement

This research was conceived without patient and public involvement. Patient and public were not invited at any stage of the study design or initiation.

## Screening

All patients will be screened for distant metastases at baseline (prior to randomization) using Positron Emission Tomography and contrast enhanced Computed tomography (PET-CECT) scan. Patients found to be non-metastatic will be subjected to staging laparoscopy to rule out peritoneal metastases.

## Participants Eligibility:

### Inclusion Criteria

Patient older than 18 years of age with histologically proven diagnosis of locally advanced GBCA (adenocarcinoma) T3 or T4 tumors with one or more of the following criteria will be included in the trial.

1. Liver invasion: more than 2 cm but less than 5 cm.
2. Radiological involvement of antropyloric region of stomach, duodenum, hepatic flexure of colon or small intestine, but without infiltration of the mucosa on endoscopy.
3. Type I/II invasion –Involvement of bile duct (common hepatic duct or proximal 1/3 of the common bile duct) on percutaneous transhepatic biliary drainage (PTBD)/Magnetic resonance cholangiopancreatography (MRCP) causing obstructive jaundice.
4. Radiological suspicion of regional lymph node involvement along hepatic artery, hepatoduodenal ligament, retropancreatic/retroduodenal: size >1cm in short axis, round in shape and heterogeneous enhancement on PET scan.



- 1
  - 2
  - 3
  - 4
  - 5
  - 6
  - 7
  - 8
  - 9
  - 10
  - 11
  - 12
  - 13
  - 14
  - 15
  - 16
  - 17
  - 18
  - 19
  - 20
  - 21
  - 22
  - 23
  - 24
  - 25
  - 26
  - 27
  - 28
  - 29
  - 30
  - 31
  - 32
  - 33
  - 34
  - 35
  - 36
  - 37
  - 38
  - 39
  - 40
  - 41
  - 42
  - 43
  - 44
  - 45
  - 46
  - 47
  - 48
  - 49
  - 50
  - 51
  - 52
  - 53
  - 54
  - 55
  - 56
  - 57
  - 58
  - 59
  - 60
5. Vascular involvement: impingement/ involvement (<180-degree angle) of one or more of the following blood vessels: common hepatic artery/right hepatic artery/main portal vein/right portal vein (stage III disease).
  6. Patient who have undergone prior cholecystectomy having residual disease with at least one of the above features.
  7. The patients must have good general condition (ECOG 0-2).
  8. Normal hematological, renal and hepatic functions done no earlier than 2 weeks prior to treatment initiation.

### **Exclusion criteria**

Those patients with resectable disease or with evidence of distant metastasis (liver, lung, peritoneum, port site) are excluded from the study. Patients with involvement of the major part of the liver that restricts delivery of full RT doses and those that have received prior radiation or chemotherapy are deemed ineligible to participate in the trial. Patients with evidence of active cholangitis or unresolved biliary obstruction will be excluded.

### **Study interventions**

#### **NACT alone arm (Standard Arm)**

Patients randomized to NACT alone arm will proceed to receive four cycles of gemcitabine (1000 mg/m<sup>2</sup>) delivered on day 1 and 8 every 3 weeks along with cisplatin (25 mg/m<sup>2</sup>) on day 1. Patients will be assessed for response and evaluated for surgical resection using PET-CECT scan after four cycles of chemotherapy. If the scans show stable but unresectable disease, then patients will continue to receive same chemotherapy. Patients showing locally progressive/systemic disease may be considered for either second line palliative chemotherapy or best supportive care. The use of radical dose chemoradiation is not allowed on disease progression in this arm. However, palliative radiation of 20-25 Gy in 4-5 fractions may be used.

Prior to each cycle of chemotherapy, assessment of hematological, renal and hepatic functions will be done. Patients with creatinine clearance >50 ml/min cisplatin will be administered at a dose of 25 mg/m<sup>2</sup>. In case of creatinine clearance between 40 and 50 ml/min, either substitution

1  
2  
3 with oxaliplatin or 20–25% dose reduction may be applied. Gemcitabine+cisplatin or  
4 gemcitabine+oxaliplatin is used and dose modification is done as decided by the medical  
5 oncologist's decision as per standard oncological guidelines.  
6  
7  
8  
9  
10

### 11 **NACRT arm (Experimental Arm)**

12  
13  
14 Patients randomized to NACRT arm will undergo radiation therapy for five weeks with  
15 concurrent gemcitabine-based chemotherapy (300 mg/m<sup>2</sup> weekly) followed by two cycles of  
16 gemcitabine + cisplatin systemic chemotherapy. The dose and schedule for gemcitabine +  
17 cisplatin chemotherapy would be same as standard arm. The chemotherapy would start 3 weeks  
18 after completion of radiation.  
19  
20  
21  
22

### 23 **Radiotherapy planning and contouring**

#### 24 **Simulation**

25  
26  
27 The planning CECT scan will be done in fasting state with patient in supine position with arms  
28 over head and a knee rest. Immobilization device such as vacuum bags or thermoplastic masks  
29 will be used. Fiducials will be placed at the laser intersection points at the level of xiphisternum.  
30 The scan will be taken from the level of carina to L4-5 level with 2.5 mm inter slice thickness in  
31 the portal phase of intravenous contrast. Respiratory motion management technique like 4DCT  
32 or deep inspiratory breath hold technique may be considered.  
33  
34  
35  
36  
37  
38  
39

#### 40 **Contouring**

41  
42 The gross tumor volume (GTV) will be delineated using the information from all available  
43 imaging such as the diagnostic triphasic CECT and PET scan and it will be fused with planning  
44 scan. It will include the primary and involved locoregional lymph nodes. The Clinical Target  
45 Volume (CTV) consists of the adjacent areas of suspected microscopic disease in the  
46 surrounding liver parenchyma and the draining locoregional lymph nodes at pericoledochal,  
47 cystic duct, retro-portal, along the common hepatic artery, along the hepatoduodenal ligament,  
48 pancreaticoduodenal, hilar, periportal, portacaval, and retro-pancreatic region. The planning  
49 target volume (PTV) will be generated by adding a safety margin of 5-7 mm around the CTV to  
50  
51  
52  
53  
54  
55  
56  
57  
58  
59  
60

1  
2  
3 counter motion and set-up variations. The aim will be to deliver 52-57 Gy/25 fractions to the  
4 gross disease and 45 Gy/25 fractions to the suspected microscopic disease along with weekly  
5 gemcitabine (300 mg/m<sup>2</sup>).  
6  
7

8  
9 Organ at risk (OAR) contouring will include liver, esophagus, stomach, duodenum, kidneys,  
10 heart, lungs, bowel and spinal cord. All care will be taken to restrict OAR doses as per standard  
11 guidelines. The dose constraints for the OAR is as follows: 70% of the liver <30 Gy, mean liver  
12 dose <25 Gy, 70% of each kidney to receive <20 Gy, mean dose <18 Gy for each kidney. V15 of  
13 the small bowel < 190cc and for duodenum: V55<1 cc, V50< 4 cc [16]. Special focus will be  
14 given to restrict dose to normal liver parenchyma and adjacent gastrointestinal structures such as  
15 duodenum to minimize radiation induced grade III or higher toxicity.  
16  
17  
18  
19  
20  
21

## 22 **Radiation plan**

23  
24 All patients will be treated with IMRT (Rapidarc or Tomotherapy). Dose –volume histograms  
25 will be evaluated for target volume coverage and normal tissue-sparing according to standard  
26 IMRT plan evaluation indices [17]. It will be ensured that 95% of the target volume receives at  
27 least 95% of the prescribed dose. Volumes of hotspots (>107% of the prescription dose) will be  
28 kept as low as possible throughout the treatment volume. Patient specific quality assurance of the  
29 approved dose plan will be done prior to RT starting.  
30  
31  
32  
33  
34  
35

## 36 **Treatment Delivery and Monitoring**

37  
38 Treatment will be delivered with daily megavoltage/kilo-voltage CT imaging to ensure adequate  
39 PTV coverage. All patients will be prescribed prophylactic antacids and mucosal coating agent  
40 from day one of radiation starting as a measure to prevent duodenal toxicity. Hematological,  
41 hepatic and renal function as well as tolerance to the treatment will be assessed weekly during  
42 NACRT. Toxicity will be recorded as per National Cancer Institute Common Terminology  
43 Criteria (CTCAE) Version 4.2 at baseline and weekly during NACRT.  
44  
45  
46  
47  
48  
49

## 50 **Efficacy and safety Assessments**

51  
52 During week 12-13 of starting the treatment, PET CECT scan will be repeated and compared  
53 with the initial scans for response assessment using the Response evaluation criteria in solid  
54  
55  
56  
57  
58  
59

1  
2  
3 tumors (RECIST) (version 1.1) criteria<sup>[18]</sup>. The response of the therapy will be assessed in terms  
4 of:  
5

6  
7 Complete Response (CR): disappearance of all target lesions. Any pathological lymph nodes  
8 (whether target or non-target) must have reduction in short axis to <10 mm.  
9

10  
11 Partial Response (PR): At least a 30% decrease in the sum of diameters of target lesions.  
12

13  
14 Progressive Disease (PD): At least a 20% increase in the sum of diameters of target lesions or  
15 appearance of one or more lesions. In addition to the relative increase of 20%, the sum must also  
16 demonstrate an absolute increase of at least 5 mm.  
17

18  
19 Stable Disease (SD): Neither sufficient shrinkage to qualify for PR/CR nor sufficient increase to  
20 qualify for PD.  
21

## 22 23 24 **Surgery**

25  
26 All patients with a CR, PR or SD will be re-evaluated for feasibility of surgery after at least 3  
27 weeks of completion of all neoadjuvant therapy in both arms. Surgical resection, if considered  
28 feasible, will be done between weeks 14 and 15 after starting of neoadjuvant therapy. The  
29 decision regarding surgery will be taken by a hepatobiliary surgical oncology consultant.  
30 Surgical resection will entail en bloc resection of the gallbladder with a wedge excision of liver/  
31 segment IVb/V excision with an aim to achieve negative margin and complete periportal  
32 lymphadenectomy (stations 8,12,13) along with sampling of inter aortocaval nodes to detect  
33 occult metastasis. Additional organ resection may be performed if necessitated to achieve R0  
34 status as guided by intraoperative frozen section. Performance of extended resections like  
35 pancreatoduodenectomy or major hepatectomy to achieve negative margins will be left to the  
36 discretion of operating surgeon. Complications following surgery will be recorded as per the  
37 Clavien-Dindo grading system<sup>[19]</sup>.  
38  
39  
40  
41  
42  
43  
44  
45  
46  
47

## 48 **Adjuvant Therapy**

49  
50 All the patients after surgery will receive 3 cycles of adjuvant chemotherapy with gemcitabine  
51 (1000mg/m<sup>2</sup>) day one and eight and cisplatin (25 mg/m<sup>2</sup>) day 1 delivered every three weeks.  
52  
53  
54  
55  
56  
57  
58  
59  
60

1  
2  
3 Patients with progressive disease and those with CR/PR/SD, not eligible for surgery will be  
4 evaluated for second line palliative chemotherapy or best supportive care.  
5  
6

### 7 **Treatment Evaluation**

8  
9  
10 CTCAE Version 4.2 will be used for reporting all acute and late toxicities. Adverse events (AEs)  
11 in both the arms will be graded using the CTCAE Version 4.2. Toxicity profile for  
12 thrombocytopenia, neutropenia, fatigue, neuropathy, vomiting, flu-like syndrome, hepatic  
13 dysfunction, gemcitabine induced rash and febrile neutropenia will be recorded. Grade 3 or more  
14 thrombocytopenia and vomiting is dose limiting toxicity and warrants a dose reduction of 25%.  
15 If grade 3 or more toxicities are observed during radiotherapy, concurrent gemcitabine dose will  
16 be withheld for a week.  
17  
18  
19  
20  
21

22  
23 Quality of Life (QOL): FACT-Hep version 4 will be used to assess QOL scores of all 5 modules  
24 of Physical well-being, Social/Family well-being, Emotional well-being, Functional well-being  
25 and hepatobiliary functions related specific questions. It will be done at baseline, at completion  
26 of all neoadjuvant treatment (prior to surgery), at treatment completion and at all follow up time  
27 points.  
28  
29  
30

### 31 **Follow Up**

32  
33  
34 Patients will be evaluated every 3 months for a period of 2 years with routine complete  
35 hemogram and biochemistry along with ultrasound abdomen and pelvis on each follow up and  
36 thereafter every 6 months. QOL with FACT Hep will be filled on every follow up.  
37  
38  
39

### 40 **Statistical Considerations**

#### 41 **Outcome measures**

42  
43 Following outcome measures would be recorded.  
44  
45

46  
47 OS: Time interval between the date of randomization and death due to any cause.  
48  
49

50  
51 PFS: Time interval between the date of randomization and loco regional or distant disease  
52 progression or death from any cause.  
53  
54  
55  
56  
57  
58  
59  
60

1  
2  
3 R0 surgical resection rate: Negative surgical margin (R0) rate as determined by intraoperative  
4 frozen section. However, final confirmation of margin status on histopathology report of the  
5 specimen would be done.  
6  
7

8  
9 R1 resection: Microscopic positive margin on histopathology.  
10

11 R 2 resection: Presence of gross residual disease or tumor spillage during surgery.  
12  
13

14 The number of patients down-staged by neoadjuvant treatment in either arm enabling a margin  
15 negative surgical resection will be documented.  
16  
17

18 Response rate: Response to treatment will be assessed with PET-CECT scan using the RECIST  
19 criteria as mentioned previously.  
20  
21  
22

### 23 **Primary endpoint**

24  
25 The primary end point of the study is the overall survival (OS). The estimated median OS in  
26 control group is 11 months with an expected increase of median OS of 16.5 months in the study  
27 arm. The sample size is 286 subjects (143 in each arm) with 80.0% power at a 0.05 two-sided  
28 significance level to detect a hazard ratio of 0.7 when the control group median OS has a hazard  
29 ratio of 1. With 10% expected lost to follow up in both groups, we will accrue 314 patients (157  
30 in each arm) for the whole study. The study duration is 60 months, of which subject accrual will  
31 be done in the first 36 months. The accrual pattern across time periods is uniform (all periods  
32 equal).  
33  
34  
35  
36  
37  
38  
39

### 40 **Data collection**

41  
42 All the data related to the study will be collected and maintained by the principal investigator at  
43 the TMH, Mumbai.  
44  
45  
46

### 47 **Treatment planning data**

48  
49 The volume, mean, median, and maximum radiation dose to PTV, duodenum, liver, stomach,  
50 both the kidneys and the bowel will be recorded for each patient. In addition, V30 liver, V20  
51 kidney, V15 small bowel and V45, V50, V55 of duodenum will be recorded.  
52  
53  
54

### 55 **Treatment data**

1  
2  
3 Data of all the treatment received will be compiled to report the dose of radiation to target and  
4 OAR, overall time of treatment, treatment gaps if any, chemotherapy dose, dose reductions.  
5 surgical outcomes and post-operative complications.  
6  
7

### 8 9 **Toxicity evaluation**

10  
11 Treatment related toxicity will be reported using CTCAE V.4.2. CTCAE forms will be filled at  
12 baseline before starting radiation, weekly during treatment and on each scheduled follow-up. If  
13 any toxicity occurs at another time point additional forms will be filled to record the toxicity.  
14  
15

### 16 17 **Quality of life**

18  
19 *FACT-Hep* version 4 will be used to assess QOL scores of all 5 modules of Physical well-being,  
20 Social/Family well-being, Emotional well-being, Functional well-being and hepatobiliary  
21 functions related specific questions. It will be done at baseline, during treatment (at completion  
22 of neoadjuvant treatment), at treatment completion and at subsequent follow ups.  
23  
24  
25  
26

### 27 28 **Clinical outcome data**

29  
30 Status of the disease will be evaluated with physical examinations and required investigations  
31 and recorded at each follow up. A detailed systemic work-up will be performed annually to  
32 detect, record and report the locoregional and distant control.  
33  
34  
35

### 36 37 **Protocol compliance**

38  
39 Inability to receive the planned treatment as per the protocol (chemotherapy as well as radiation)  
40 will be regarded as major violation which will be reported to the institutional review board  
41 (IRB). Inability to achieve target or OAR constraints, patient misses 2-3 fractions of RT or 1-2  
42 cycles of concurrent chemotherapy will be considered as minor violation.  
43  
44  
45

### 46 47 **Event reporting**

48  
49 All events related to the study will be recorded using CTCAE V.4.2. All serious adverse event  
50 (SAE) will be reported. Serious Adverse Events within the test arm will necessitate  
51 hospitalization. Toxicity arising out of systemic chemotherapy or patients developing cholangitis  
52 will not be considered trial related injury or a related SAE. CTCAE Version 4.2 will be used for  
53  
54  
55  
56  
57  
58  
59

1  
2  
3 reporting of all SAE to the IRB within 24 hours of the occurrence. Similarly, all deaths will be  
4 notified to the IRB.  
5  
6

### 7 **Trial monitoring**

8  
9  
10 The progress of the trial will be monitored at regular interval by the institutional data and safety  
11 monitoring board and the report will be submitted to the ethics committee and IRB.  
12  
13

### 14 **Data analysis plan**

#### 15 **Primary aim**

16  
17  
18  
19 Kaplan-Meier curves for OS will be generated for both the arms and OS will be compared using  
20 log-rank test stratified for the stratification factors that were used during randomization (T stage).  
21  
22 A p value of  $<0.05$  will be considered statistically significant and used to reject the null  
23 hypothesis.  
24  
25

26  
27 **Secondary aim** A similar Kaplan-Meier analysis will be performed for PFS. Toxicity  
28 assessment will be using categorized groups between two the arms and chi square test will be  
29 used. R0 surgical resection rates and response rates will be calculated within each treatment arm  
30 along with exact 95% confidence intervals based on binomial distributions compared between  
31 treatment arms using two-sample Cochran-Mantel-Haenszel test at the 5% level of significance.  
32  
33 Rates of Grade III and IV adverse events will be summarized by treatment arm using descriptive  
34 statistics.  
35  
36  
37  
38  
39

#### 40 **QOL analysis**

41  
42  
43 Standard recommendations will be used to analyze QOL data of the two study arms and repeated  
44 measures ANOVA will be used to compare QOL between two arms.  
45  
46

#### 47 **Implications for research**

48  
49  
50 The current study aims to assess the benefit of NACRT over chemotherapy alone in terms of OS  
51 in locally advanced GBC. If proven to be effective, it would redefine the current standard of care  
52 for these patients.  
53  
54  
55  
56  
57  
58  
59  
60



Funding: The study is funded by intramural grant supported by the institution where it is being conducted.

Conflicts of interest-None of the authors have conflicting interests.

## References

1. de Groen PC, Gores GJ et al. Biliary tract cancers. *The New England journal of medicine*. 1999 Oct 28;341(18):1368-78.
2. Misra S, Chaturvedi A, Misra NC, Sharma ID. Carcinoma of the gallbladder. *The lancet oncology*. 2003 Mar 31;4(3):167-76.
3. Jin LX, Pitt SC, Hall BL, Pitt HA. Aggressive surgical management of gallbladder cancer: At what cost?. *Surgery*. 2013 Aug 31;154(2):266-73.
4. Dixon E, Vollmer Jr CM, Sahajpal A, Cattral M, Grant D, Doig C, Hemming A, Taylor B, Langer B, Greig P, Gallinger S. An aggressive surgical approach leads to improved survival in patients with gallbladder cancer: a 12-year study at a North American Center. *Annals of surgery*. 2005 Mar;241(3):385.
5. Nishio H, Ebata T, Yokoyama Y, Igami T, Sugawara G, Nagino M. Gallbladder cancer involving the extrahepatic bile duct is worthy of resection. *Annals of surgery*. 2011 May 1;253(5):953-60.
6. D'hondt M, Lapointe R, Benamira Z, Pottel H, Plasse M, Letourneau R, Roy A, Dagenais M, Vandenbroucke-Menu F. Carcinoma of the gallbladder: patterns of presentation, prognostic factors and survival rate. An 11-year single centre experience. *European Journal of Surgical Oncology*. 2013 Jun 1;39(6):548-53.
7. Sasaki R, Takahashi M, Funato O, Nitta H, Murakami M, Kawamura H, Suto T, Kanno S, Saito K. Hepatopancreatoduodenectomy with wide lymph node dissection for locally advanced carcinoma of the gallbladder--long-term results. *Hepato-gastroenterology*. 2002;49(46):912-5.
8. Araida T, Yoshikawa T, Azuma T, Ota T, Takasaki K, Hanyu F. Indications for pancreatoduodenectomy in patients undergoing lymphadenectomy for advanced gallbladder carcinoma. *Journal of Hepato-Biliary-Pancreatic Sciences*. 2004 Feb 1;11(1):45-9.
9. Birnbaum DJ, Vigano L, Ferrero A, Langella S, Russolillo N, Capussotti L. Locally advanced gallbladder cancer: which patients benefit from resection?. *European Journal of Surgical Oncology*. 2014 Aug 1;40(8):1008-15.
10. Valle J, Wasan H, Palmer DH, Cunningham D, Anthony A, Maraveyas A, Madhusudan S, Iveson T, Hughes S, Pereira SP, Roughton M. Cisplatin plus gemcitabine versus gemcitabine for biliary tract cancer. *New England Journal of Medicine*. 2010 Apr 8;362(14):1273-81.

11. Chaudhari VA, Ostwal V, Patkar S, Sahu A, Toshniwal A, Ramaswamy A, Shetty NS, Shrikhande SV, Goel M. Outcome of neoadjuvant chemotherapy in “locally advanced/borderline resectable” gallbladder cancer: the need to define indications. *HPB*. 2018 Apr 26.
12. Losada H, Mora J, Roa I, Burgos L, Yáñez E, Quijada I, Roa JC. Neoadjuvant chemoradiotherapy in gallbladder cancer. *Revista medica de Chile*. 2004 Jan;132(1):51-7.
13. Morganti AG, Trodella L, Valentini V, Montemaggi P, Costamagna G, Smaniotto D, Luzi S, Ziccarelli P, Macchia G, Perri V, Mutignani M. Combined modality treatment in unresectable extrahepatic biliary carcinoma. *International Journal of Radiation Oncology\* Biology\* Physics*. 2000 Mar 1;46(4):913-9.
14. Engineer R, Wadasadawala T, Mehta S, Mahantshetty U, Purandare N, Rangarajan V, Shrivastava SK. Chemoradiation for unresectable gallbladder cancer: time to review historic nihilism?. *Journal of gastrointestinal cancer*. 2011 Dec 1;42(4):222-7.
15. Cited in Scopus: Retrospective Study on the Dosimetric and Clinical Evaluation of Duodenal Toxicity in Those Who Underwent Radiation Therapy for Cancers of the Upper Gastrointestinal Tract and Gynecological Cancers Who Received Extended Field Radiotherapy. R. Engineer, S. Sastri, G.J. George. *International Journal of Radiation Oncology • Biology • Physics*, Vol. 99, Issue 2, E147
16. Engineer R, Goel M, Chopra S, Patil P, Purandare N, Rangarajan V, Ph R, Bal M, Shrikhande S, Shrivastava SK, Mehta S. Neoadjuvant chemoradiation followed by surgery for locally advanced gallbladder cancers: a new paradigm. *Annals of surgical oncology*. 2016 Sep 1;23(9):3009-15.
17. Grégoire V, Mackie TR. State of the art on dose prescription, reporting and recording in Intensity-Modulated Radiation Therapy (ICRU report No. 83). *Cancer/Radiothérapie*. 2011 Oct 1;15(6-7):555-9.
18. Eisenhauer EA, Therasse P, Bogaerts J, Schwartz LH, Sargent D, Ford R, Dancey J, Arbuck S, Gwyther S, Mooney M, Rubinstein L. New response evaluation criteria in solid tumours: revised RECIST guideline (version 1.1). *European journal of cancer*. 2009 Jan 1;45(2):228-47.
19. Dindo D, Demartines N, Clavien PA. Classification of surgical complications: a new proposal with evaluation in a cohort of 6336 patients and results of a survey. *Annals of surgery*. 2004 Aug;240(2):205.

### Authors' Contributions

1  
2  
3  
4  
5 Engineer R. is the Principal Investigator and participated in project concept, design, final  
6 approval and manuscript preparation, review and submission.  
7

8 Patkar S. participated in final approval of protocol, manuscript preparation and manuscript  
9 review and submission.  
10

11 Lewis S. participated in review of protocol, final approval of protocol, manuscript preparation.  
12

13 Sharma A.D. participated in manuscript preparation, review of manuscript and submission.  
14

15 Shetty N. participated in final approval of draft, review of manuscript, preparation of manuscript.  
16

17 Ostwal V. participated in review of manuscript for content, review and preparation of  
18 manuscript, submission of final protocol and final approval.  
19

20 Ramaswamy A. participated in review and preparation of manuscript, preparation of trial  
21 protocol and final approval of trial protocol.  
22

23 Chopra S. participated in drafting final protocol, review of contents of the protocol, manuscript  
24 preparation and final approval.  
25

26 Agrawal A. participated in manuscript preparation, review of final protocol and approval of final  
27 protocol draft.  
28

29 Patil P. participated in concept and design, preparation of manuscript, review of manuscript,  
30 final approval of trial protocol.  
31

32 Mehta S. participated in review of manuscript, manuscript preparation, drafting of final report  
33 and final approval.  
34

35 Goel M. participated in concept and design, review of manuscript, manuscript preparation and  
36 drafting of final report and final approval of trial protocol.  
37  
38  
39  
40  
41  
42  
43  
44  
45  
46  
47  
48  
49  
50  
51  
52  
53  
54  
55  
56  
57  
58  
59  
60

# BMJ Open

## A Phase III Randomized Clinical trial of Perioperative therapy (Neoadjuvant chemotherapy v/s chemoradiotherapy) in locally advanced gall bladder cancers(POLCAGB) - Study Protocol

|                                 |                                                                                                                                                                                                                                                                                                                                                                                                                                                                                                                                                                                                                                                                                                                                                                                                                                                                                                                           |
|---------------------------------|---------------------------------------------------------------------------------------------------------------------------------------------------------------------------------------------------------------------------------------------------------------------------------------------------------------------------------------------------------------------------------------------------------------------------------------------------------------------------------------------------------------------------------------------------------------------------------------------------------------------------------------------------------------------------------------------------------------------------------------------------------------------------------------------------------------------------------------------------------------------------------------------------------------------------|
| Journal:                        | <i>BMJ Open</i>                                                                                                                                                                                                                                                                                                                                                                                                                                                                                                                                                                                                                                                                                                                                                                                                                                                                                                           |
| Manuscript ID                   | bmjopen-2018-028147.R1                                                                                                                                                                                                                                                                                                                                                                                                                                                                                                                                                                                                                                                                                                                                                                                                                                                                                                    |
| Article Type:                   | Protocol                                                                                                                                                                                                                                                                                                                                                                                                                                                                                                                                                                                                                                                                                                                                                                                                                                                                                                                  |
| Date Submitted by the Author:   | 02-Apr-2019                                                                                                                                                                                                                                                                                                                                                                                                                                                                                                                                                                                                                                                                                                                                                                                                                                                                                                               |
| Complete List of Authors:       | Engineer, Reena; Tata Memorial Centre<br>Patkar, Shraddha; Tata Memorial Centre, Department of Surgical Oncology<br>Lewis, Shirley; Tata Memorial Hospital, Radiation Oncology<br>Sharma, Ashutosh; Tata Memorial Centre, radiation oncology;<br>Shetty, Nitin ; Tata Memorial Centre, Department of Radiodiagnosis<br>Ostwal, Vikas; Tata Memorial Centre, Department of Medical Oncology, GastroIntestinal Disease Management Group<br>Ramaswamy, Anant; Tata Memorial Centre, Department of Medical Oncology, Gastrointestinal Disease Management Group<br>Chopra, Supriya; Tata Memorial Centre<br>Agrawal, Archi; Tata Memorial Hospital, Nuclear Medicine<br>Patil, Prachi; Tata Memorial Centre, Department of Digestive Diseases and Clinical Nutrition<br>Mehta, Shaesta; Tata Memorial Centre, Department of Digestive Diseases and Clinical Nutrition<br>Goel, Mahesh; Tata Memorial Centre, Surgical Oncology |
| <b>Primary Subject Heading</b>: | Oncology                                                                                                                                                                                                                                                                                                                                                                                                                                                                                                                                                                                                                                                                                                                                                                                                                                                                                                                  |
| Secondary Subject Heading:      | Gastroenterology and hepatology, Oncology, Surgery                                                                                                                                                                                                                                                                                                                                                                                                                                                                                                                                                                                                                                                                                                                                                                                                                                                                        |
| Keywords:                       | Radiation oncology < RADIOTHERAPY, Hepatobiliary tumours < ONCOLOGY, Gastrointestinal tumours < ONCOLOGY, Hepatobiliary surgery < SURGERY, Clinical trials < THERAPEUTICS                                                                                                                                                                                                                                                                                                                                                                                                                                                                                                                                                                                                                                                                                                                                                 |
|                                 |                                                                                                                                                                                                                                                                                                                                                                                                                                                                                                                                                                                                                                                                                                                                                                                                                                                                                                                           |

SCHOLARONE™  
Manuscripts

1  
2  
3  
4  
5  
6  
7  
8  
9  
10  
11  
12  
13  
14  
15  
16  
17  
18  
19  
20  
21  
22  
23  
24  
25  
26  
27  
28  
29  
30  
31  
32  
33  
34  
35  
36  
37  
38  
39  
40  
41  
42  
43  
44  
45  
46  
47  
48  
49  
50  
51  
52  
53  
54  
55  
56  
57  
58  
59  
60

**Title page**

**A Phase III Randomized Clinical trial of Perioperative therapy (Neoadjuvant chemotherapy v/s chemoradiotherapy) in locally advanced gall bladder cancers (POLCAGB) - Study Protocol**

Reena Engineer<sup>1</sup>, Shraddha Patkar<sup>2</sup>, Shirley Lewis<sup>1</sup>, Ashutosh Das Sharma<sup>1</sup>, Nitin Shetty<sup>3</sup>, Vikas Ostwal<sup>4</sup>, Anant Ramaswamy<sup>4</sup>, Supriya Chopra<sup>5</sup>, Archi Agrawal<sup>6</sup>, Prachi Patil<sup>7</sup>, Shaesta Mehta<sup>7</sup>, Mahesh Goel<sup>2</sup>

1- Department of Radiation Oncology, Tata Memorial Hospital, Mumbai, India

2- Department of Surgical Oncology, Tata Memorial Hospital, Mumbai, India

3- Department of Radiodiagnosis, Tata Memorial Hospital, Mumbai, India

4- Department of Medical Oncology, Tata Memorial Hospital, Mumbai, India

5- Department of Radiation Oncology, ACTREC, Tata Memorial Centre, Mumbai, India

6- Department of Nuclear Medicine, Tata Memorial Hospital, Mumbai, India

7- Department of Digestive Diseases and Clinical Nutrition, Tata Memorial Hospital, Mumbai, India

**Corresponding author-** Reena Engineer

Room no. 322

Tata Memorial Hospital

Dr.E. Borgese Road

Parel

Mumbai, MH

India

+912224177000(ext-7165)

[Email-reena.engineer@gmail.com](mailto:reena.engineer@gmail.com)

**Key words:** Radiation oncology, Hepatobiliary tumours, Gastrointestinal tumours, Hepatobiliary surgery , Clinical trials

**Running Title:** Perioperative therapy in Locally Advanced GBC, A phase 3 RCT

**Word Count:** 3157

## Main Document

### **A Phase III Randomized Clinical trial of Perioperative therapy (Neoadjuvant chemotherapy v/s chemoradiotherapy) in locally advanced gall bladder cancers (POLCA-GB).**

#### **ABSTRACT**

##### **Introduction:**

There is no consensus regarding the optimal treatment approach for locally advanced gall bladder cancer. Outcomes following surgery have been modest at its best. Neoadjuvant chemotherapy for downstaging has shown encouraging results in few studies for this group of locally advanced gall bladder cancer (LAGBC) with an inherent aggressive tumor biology. A pilot study from our institution has shown improved overall survival and progression free survival with neoadjuvant chemoradiation. The present randomized phase 3 trial is designed to compare neoadjuvant chemoradiation with neoadjuvant chemotherapy alone and will test the superiority of chemoradiation in terms of tumor downstaging and improvement in overall survival.

##### **Methods and analysis:**

Patients with biopsy proven LAGBC (T3-4) with predefined clinico-radiological features will be randomized to gemcitabine-based chemotherapy alone arm or chemoradiation arm. Patients with resectable disease or with distant metastases will be excluded. The primary end point of the study is to compare overall survival between the two arms. The secondary end points are to compare progression free survival, R0 resection rates, acute and late toxicity, postoperative complications, and quality of life between the two study arms. The trial is designed to detect an improvement in the median overall survival by 5.5 months in the study arm (11 months in control group; Hazard ratio of 0.7) with 80.0% power at a 0.05 significance level. The resultant sample size to achieve this aim is 314 (157 in each arm) over a duration of 5 years with a 10% attrition rate. The study has been approved by the institutional review board at Tata Memorial Hospital (Project No 1652)

##### **Registration:**

The trial is registered with Clinical Trials Registry India (CTRI/2016/08/007199) and ClinicalTrials.gov (NCT02867865)

### Strengths and limitations of the study:

Strengths of this study are:

1-This is the first randomized study evaluating chemoradiation in the neoadjuvant setting.

2-Treatment of locally advanced GBC is not standardized and this trial will give an opportunity to do so.

The limitations of this study are:

1-Slower recruitment of patients- As majority of patients with GBC in population present late in the course of the disease, a large fraction of the screened patients turn out to be metastatic or with advanced disease, that do not meet the stringent inclusion criteria for the trial. This has resulted in low enrolment into the study.

2-Compliance of patients- The long treatment time (>6 months) combined with the socioeconomic restrictions of the majority of the population makes it challenging for the patients to stick to the advised care resulting in financial burden and subsequently increased susceptibility of drop out and loss of follow up.

3-As the treatment is decided and delivered by a large team of physicians that consists of radiologists, gastroenterologist, oncosurgeons, medical oncologists and radiation oncologists, the coordination of the team becomes challenging.

### Introduction

Gallbladder cancer (GBC) is the most common malignancy of the biliary tract <sup>[1]</sup>. Its incidence is alarmingly high in Chile, Japan, and northern India <sup>[2]</sup>. Complete surgical excision is the standard of care for early stage GBC. Unfortunately, majority of the cases are diagnosed at an advanced or metastatic stage and only 10–30% of the patient present with resectable disease <sup>[2]</sup>.

GBC with liver infiltration, with or without visceral/vascular infiltration, or having large local lymph node metastases in the absence of distant metastases are generally considered as locally advanced. Prognosis for locally advanced disease in terms of resectability and survival remains dismal in most of the reports <sup>[3]</sup>. Even with aggressive surgery like extrahepatic bile duct resection

1  
2  
3 or pancreaticoduodenectomy, the 5-year survival rate for stage III disease at best ranges from 30%  
4 to 42%. These results are often not reproducible in routine clinical practice [4-9].  
5  
6

7 Locally advanced GBC, where surgery is not possible, are treated with chemotherapy alone as the  
8 current standard of care. In ABC02 trial by Valle et al, chemotherapy with gemcitabine and  
9 cisplatin was found to be superior to gemcitabine alone in terms of local tumor response [10]. Some  
10 locally advanced non-metastatic GBC do get down-staged to undergo resection following NACT.  
11 In a publication from our institute, gemcitabine/cisplatin based NACT alone resulted in R0  
12 resection rate of 46% and median overall survival (OS) and progression free survival (PFS) of 13.4  
13 months and 8.1 months respectively [11,12].  
14  
15  
16  
17  
18  
19

20 Few studies have reported the outcomes of neoadjuvant chemoradiation (NACRT) with limited  
21 success [13-14]. In an earlier report, we published the outcomes of 3 patients with unresectable  
22 tumors, 2 of which were down staged to undergo R0 resection with high dose NACRT [15]. In a  
23 pilot study of 28 patients conducted at our center, treated with NACRT, 47% of the patients  
24 underwent R0 resections with median OS and PFS being 35 and 20 months respectively [16].  
25  
26  
27  
28  
29

30 There is no consensus on the optimal neoadjuvant approach in locally advanced GBCA. However,  
31 most of the treating physicians prefer to use NACT alone followed by surgical resection if down  
32 staging is achieved. The present randomized trial is designed to compare NACRT against NACT  
33 alone and will test the superiority of one over the other in terms of down staging and prolonging  
34 survival.  
35  
36  
37  
38

## 39 **Methods and analysis**

### 40 **Hypothesis**

41  
42 On the basis of encouraging results obtained with NACRT, we hypothesize that NACRT and  
43 additional chemotherapy will improve OS compared to NACT alone in locally advanced GBCA.  
44  
45  
46  
47  
48

### 49 **Study aim**

50  
51 The primary aim of the study is to compare the OS between the patients treated with NACT alone  
52 vs NACRT. The secondary aims are to compare the R0 surgical resection rate, PFS, acute and late  
53 toxicity, postoperative complications, and quality of life between two study arms.  
54  
55  
56  
57  
58  
59  
60



## Study Design

This study is a Phase III randomized control trial designed to compare the OS between the two neoadjuvant treatment arms. All patients with diagnosis of non-metastatic locally advanced GBCA who fulfill the study eligibility criteria will be evaluated for participation in the study. Patients will undergo upfront randomization into one of the study arms (neoadjuvant chemotherapy or chemoradiation) using permuted block stratified randomization. Stratification will be done according the T stage (T1-4). All randomization will be done through clinical research secretariat (CRS) at Tata Memorial Hospital (TMH).

## Research Setting

The study will be conducted at TMH, Tata Memorial Centre(TMC), and Advanced Centre for Treatment Research and Education(ACTREC), Mumbai, India and other collaborating centers.

## Patients and Public Involvement

This research was conceived without patient and public involvement. Patient and public were not invited at any stage of the study design or initiation.

## Screening

All patients will be screened for distant metastases at baseline (prior to randomization) using Positron Emission Tomography and contrast enhanced Computed tomography (PET-CECT) scan. Patients found to be non-metastatic will be subjected to staging laparoscopy to rule out peritoneal metastases. A tissue diagnosis from the primary would be done by either biopsy or fine needle aspiration cytology.

## Participants Eligibility:

### Inclusion Criteria

Patient older than 18 years of age with histologically proven diagnosis of locally advanced GBC T3 or T4 tumors with one or more of the following criteria will be included in the trial.

1. Liver invasion: more than 2 cm but less than 5 cm.

2. Radiological involvement of antropyloic region of stomach, duodenum, hepatic flexure of colon or small intestine, but without infiltration of the mucosa on endoscopy.
3. Type I/II invasion –Involvement of bile duct (common hepatic duct or proximal 1/3 of the common bile duct) on percutaneous transhepatic biliary drainage (PTBD)/Magnetic resonance cholangiopancreatography (MRCP) causing obstructive jaundice.
4. Radiological suspicion of regional lymph node involvement along hepatic artery, hepatoduodenal ligament, retropancreatic/retroduodenal: size>1cm in short axis, round in shape and heterogeneous enhancement on PET scan.
5. Vascular involvement: impingement/ involvement (<180-degree angle) of one or more of the following blood vessels: common hepatic artery/right hepatic artery/main portal vein/right portal vein (stage III -IV disease).
6. Patient who have undergone prior cholecystectomy having residual disease with at least one of the above features.
7. The patients must have good general condition (ECOG 0-2).
8. Normal hematological, renal and hepatic functions done no earlier than 2 weeks prior to treatment initiation.
9. Biopsy confirmation of adenocarcinoma

### **Exclusion criteria**

Those patients with resectable disease or with evidence of distant metastasis (liver, lung, peritoneum, port site) are excluded from the study. Patients with involvement of the major part of the liver that restricts delivery of full RT doses and those that have received prior radiation or chemotherapy are deemed ineligible to participate in the trial. Patients with evidence of active cholangitis or unresolved biliary obstruction will be excluded.

## Study interventions

### NACT alone arm (Standard Arm)

Patients randomized to NACT alone arm will proceed to receive four cycles of gemcitabine (1000 mg/m<sup>2</sup>) delivered on day 1 and 8 every 3 weeks along with cisplatin (25 mg/m<sup>2</sup>) on day 1. Patients will be assessed for response and evaluated for surgical resection using PET-CECT scan after four cycles of chemotherapy. If the scans show stable but unresectable disease, then patients will continue to receive same chemotherapy. Patients showing locally progressive/systemic disease may be considered for either second line palliative chemotherapy or best supportive care. The use of radical dose chemoradiation is not allowed on disease progression in this arm. However, palliative radiation of 20-25 Gy in 4-5 fractions may be used.

Prior to each cycle of chemotherapy, assessment of hematological, renal and hepatic functions will be done. Patients with creatinine clearance >50 ml/min cisplatin will be administered at a dose of 25 mg/m<sup>2</sup>. In case of creatinine clearance between 40 and 50 ml/min, either substitution with oxaliplatin or 20–25% dose reduction may be applied. Gemcitabine+cisplatin or gemcitabine+oxaliplatin is used and dose modification is done as decided by the medical oncologist's decision as per standard oncological guidelines.

### NACRT arm (Experimental Arm)

Patients randomized to NACRT arm will undergo radiation therapy for five weeks with concurrent gemcitabine-based chemotherapy (300 mg/m<sup>2</sup> weekly) followed by two cycles of gemcitabine + cisplatin systemic chemotherapy. The dose and schedule for gemcitabine - cisplatin chemotherapy would be same as standard arm. The chemotherapy would start 3 weeks after completion of radiation.

## Radiotherapy planning and contouring

### Simulation

The planning CECT scan will be done in fasting state with patient in supine position with arms over head and a knee rest. Immobilization device such as vacuum bags or thermoplastic masks will be used. Fiducials will be placed at the laser intersection points at the level of xiphisternum.

1  
2  
3 The scan will be taken from the level of carina to L4-5 level with 2.5 mm inter slice thickness in  
4 the portal phase of intravenous contrast. Respiratory motion management technique like 4DCT or  
5 deep inspiratory breath hold technique may be considered.  
6  
7

### 8 9 **Contouring**

10  
11 The gross tumor volume (GTV) will be delineated using the information from all available imaging  
12 such as the diagnostic triphasic CECT and PET scan and it will be fused with planning scan. It  
13 will include the primary and involved locoregional lymph nodes. The Clinical Target Volume  
14 (CTV) consists of the adjacent areas of suspected microscopic disease in the surrounding liver  
15 parenchyma and the draining locoregional lymph nodes at pericoledochal, cystic duct, retro-portal,  
16 along the common hepatic artery, along the hepatoduodenal ligament, pancreaticoduodenal, hilar,  
17 periportal, portacaval, and retro-pancreatic region. The planning target volume (PTV) will be  
18 generated by adding a safety margin of 5-7 mm around the CTV to counter motion and set-up  
19 variations. The aim will be to deliver 52-57 Gy/25 fractions to the gross disease and 45 Gy/25  
20 fractions to the suspected microscopic disease along with weekly gemcitabine (300 mg/m<sup>2</sup>).  
21  
22  
23  
24  
25  
26  
27  
28

29  
30 Organ at risk (OAR) contouring will include liver, esophagus, stomach, duodenum, kidneys, heart,  
31 lungs, bowel and spinal cord. All care will be taken to restrict OAR doses as per standard  
32 guidelines. The dose constraints for the OAR is as follows: 70% of the liver <30 Gy, mean liver  
33 dose <25 Gy, 70% of each kidney to receive <20 Gy, mean dose <18 Gy for each kidney. V15 of  
34 the small bowel < 190cc and for duodenum: V55<1 cc, V50< 4 cc<sup>[17]</sup>. Special focus will be given  
35 to restrict dose to normal liver parenchyma and adjacent gastrointestinal structures such as  
36 duodenum to minimize radiation induced grade III or higher toxicity.  
37  
38  
39  
40  
41  
42

### 43 **Radiation plan**

44  
45 All patients will be treated with IMRT (Rapidarc or Tomotherapy). Dose –volume histograms will  
46 be evaluated for target volume coverage and normal tissue-sparing according to standard IMRT  
47 plan evaluation indices<sup>[18]</sup>. It will be ensured that 95% of the target volume receives at least 95%  
48 of the prescribed dose. Volumes of hotspots (>107% of the prescription dose) will be kept as low  
49 as possible throughout the treatment volume. Patient specific quality assurance of the approved  
50 dose plan will be done prior to RT starting.  
51  
52  
53  
54  
55  
56  
57  
58  
59  
60

## Treatment Delivery and Monitoring

Treatment will be delivered with daily megavoltage/kilo-voltage CT imaging to ensure adequate PTV coverage. All patients will be prescribed prophylactic antacids and mucosal coating agent from first day of radiation as a measure to prevent duodenal toxicity. Hematological, hepatic and renal function as well as tolerance to the treatment will be assessed weekly during NACRT. Toxicity will be recorded as per National Cancer Institute Common Terminology Criteria (CTCAE) Version 4.2 at baseline and weekly during NACRT.

## Efficacy and safety Assessments

At week 12-13 from day 1 of RT, PET CECT scan will be repeated and compared with the initial scans for response assessment using the Response evaluation criteria in solid tumors (RECIST) (version 1.1) criteria<sup>[19]</sup>. The response of the therapy will be assessed in terms of:

Complete Response (CR): disappearance of all target lesions. Any pathological lymph nodes (whether target or non-target) must have reduction in short axis to <10 mm.

Partial Response (PR): At least a 30% decrease in the sum of diameters of target lesions.

Progressive Disease (PD): At least a 20% increase in the sum of diameters of target lesions or appearance of one or more lesions. In addition to the relative increase of 20%, the sum must also demonstrate an absolute increase of at least 5 mm.

Stable Disease (SD): Neither sufficient shrinkage to qualify for PR/CR nor sufficient increase to qualify for PD.

## Surgery

All patients with a CR, PR or SD will be re-evaluated for feasibility of surgery after at least 3 weeks of completion of all neoadjuvant therapy in both arms. Surgical resection, if considered feasible, will be done between weeks 14 and 15 after starting of neoadjuvant therapy. The decision regarding surgery will be taken by a hepatobiliary surgical oncology consultant. Surgical resection will entail en bloc resection of the gallbladder with a wedge excision of liver/ segment IVb/V excision with an aim to achieve negative margin and complete periportal lymphadenectomy (stations 8,12,13) along with sampling of inter aortocaval nodes to detect occult metastasis.

1  
2  
3 Additional organ resection may be performed if necessitated to achieve R0 status as guided by  
4 intraoperative frozen section. Performance of extended resections like pancreatoduodenectomy or  
5 major hepatectomy to achieve negative margins will be left to the discretion of operating surgeon.  
6  
7 Complications following surgery will be recorded as per the Clavien-Dindo grading system [20].  
8  
9

### 10 **Adjuvant Therapy**

11  
12  
13 All the patients after surgery will receive 3 cycles of adjuvant chemotherapy with gemcitabine  
14 (1000mg/m<sup>2</sup>) day one and eight and cisplatin (25 mg/m<sup>2</sup>) day 1 delivered every three weeks.  
15  
16 Patients with progressive disease and those with CR/PR/SD, not eligible for surgery, will be  
17 evaluated for second line palliative chemotherapy or best supportive care.  
18  
19  
20

### 21 **Treatment Evaluation**

22  
23  
24 CTCAE Version 4.2 will be used for reporting all acute and late toxicities. Adverse events (AEs)  
25 in both the arms will be graded using the CTCAE Version 4.2. Toxicity profile for  
26 thrombocytopenia, neutropenia, fatigue, neuropathy, vomiting, flu-like syndrome, hepatic  
27 dysfunction, gemcitabine induced rash and febrile neutropenia will be recorded. Grade 3 or more  
28 thrombocytopenia and vomiting is dose limiting toxicity and warrants a dose reduction of 25%. If  
29 grade 3 or more toxicities are observed during radiotherapy, concurrent gemcitabine dose will be  
30 withheld for a week.  
31  
32  
33  
34  
35

36  
37 Quality of Life (QOL): FACT-Hep version 4 will be used to assess QOL scores of all 5 modules  
38 of Physical well-being, Social/Family well-being, Emotional well-being, Functional well-being  
39 and hepatobiliary functions related specific questions. It will be done at baseline, at completion of  
40 all neoadjuvant treatment (prior to surgery), at treatment completion and at all follow up time  
41 points.  
42  
43  
44

### 45 **Follow Up**

46  
47  
48 Patients will be evaluated every 3 months for a period of 2 years with routine complete hemogram  
49 and biochemistry along with ultrasound abdomen and pelvis on each follow up and thereafter every  
50 6 months. QOL with FACT Hep will be filled on every follow up.  
51  
52  
53  
54  
55  
56  
57  
58  
59  
60

## **Statistical Considerations**

### **Outcome measures**

Following outcome measures would be recorded.

OS: Time interval between the date of randomization and death due to any cause.

PFS: Time interval between the date of randomization and loco regional or distant disease progression or death from any cause.

R0 surgical resection rate: Negative surgical margin (R0) rate as determined by intraoperative frozen section. However, final confirmation of margin status on histopathology report of the specimen would be done.

R1 resection: Microscopic positive margin on histopathology.

R 2 resection: Presence of gross residual disease or tumor spillage during surgery.

The number of patients down-staged by neoadjuvant treatment in either arm enabling a margin negative surgical resection will be documented.

Response rate: Response to treatment will be assessed with PET-CECT scan using the RECIST criteria as mentioned previously. Pathological response rate in both arms would also be assessed.

### **Primary endpoint**

The primary end point of the study is the overall survival (OS). The estimated median OS in control group is 11 months with an expected increase of median OS of 16.5 months in the study arm. The sample size is 286 subjects (143 in each arm) with 80.0% power at a 0.05 two-sided significance level to detect a hazard ratio of 0.7 when the control group median OS has a hazard ratio of 1. With 10% expected lost to follow up in both groups, we will accrue 314 patients (157 in each arm) for the whole study. The study duration is 60 months, of which subject accrual will be done in the first 36 months. The accrual pattern across time periods is uniform (all periods equal).

### **Data collection**

All the data related to the study will be collected and maintained by the principal investigator at the TMH, Mumbai.

### **Treatment planning data**

The volume, mean, median, and maximum radiation dose to PTV, duodenum, liver, stomach, both the kidneys and the bowel will be recorded for each patient. In addition, V30 liver, V20 kidney, V15 small bowel and V45, V50, V55 of duodenum will be recorded.

### **Treatment data**

Data of all the treatment received will be compiled to report the dose of radiation to target and OAR, overall time of treatment, treatment gaps if any, chemotherapy dose, dose reductions, surgical outcomes and post-operative complications.

### **Toxicity evaluation**

Treatment related toxicity will be reported using CTCAE V.4.2. CTCAE forms will be filled at baseline before starting radiation, weekly during treatment and on each scheduled follow-up. If any toxicity occurs at another time point additional forms will be filled to record the toxicity.

### **Quality of life**

*FACT-Hep* version 4 will be used to assess QOL scores of all 5 modules of Physical well-being, Social/Family well-being, Emotional well-being, Functional well-being and hepatobiliary functions related specific questions. It will be done at baseline, during treatment (at completion of neoadjuvant treatment), at treatment completion and at subsequent follow ups.

### **Clinical outcome data**

Status of the disease will be evaluated with physical examinations and required investigations and recorded at each follow up. A detailed systemic work-up will be performed annually to detect, record and report the locoregional and distant control.



### Protocol compliance

Inability to receive the planned treatment as per the protocol (chemotherapy as well as radiation) will be regarded as major violation which will be reported to the institutional review board (IRB). Inability to achieve target or OAR constraints, patient misses 2-3 fractions of RT or 1-2 cycles of concurrent chemotherapy will be considered as minor violation.

### Event reporting

All events related to the study will be recorded using CTCAE V.4.2. All serious adverse event (SAE) will be reported. Serious Adverse Events within the test arm will necessitate hospitalization. Toxicity arising out of systemic chemotherapy or patients developing cholangitis will not be considered trial related injury or a related SAE. CTCAE Version 4.2 will be used for reporting of all SAE to the IRB within 24 hours of the occurrence. Similarly, all deaths will be notified to the IRB.

### Trial monitoring

The progress of the trial will be monitored at regular interval by the institutional data and safety monitoring board and the report will be submitted to the ethics committee and IRB.

**Data analysis plan** – Intention to treat analysis will be performed along with survival for patients who undergo surgery in both the groups.

### Primary aim

Kaplan-Meier curves for OS will be generated for both the arms and OS will be compared using log-rank test stratified for the stratification factors that were used during randomization (T stage). A p value of  $<0.05$  will be considered statistically significant and used to reject the null hypothesis.

**Secondary aim** A similar Kaplan-Meier analysis will be performed for PFS. Toxicity assessment will be using categorized groups between two the arms and chi square test will be used. R0 surgical resection rates and response rates will be calculated within each treatment arm along with exact 95% confidence intervals based on binomial distributions compared between treatment arms using two-sample Cochran-Mantel-Haenszel test at the 5% level of significance. Rates of Grade III and IV adverse events will be summarized by treatment arm using descriptive statistics.

### **Ethics and Dissemination:**

The institutional ethics committee of Tata Memorial Hospital Mumbai has approved this trial and will be routinely monitoring the trial at frequent intervals. The results of the study will be disseminated via peer reviewed scientific journals, conference presentations and submission to regulatory authorities.

### **QOL analysis**

Standard recommendations will be used to analyze QOL data of the two study arms and repeated measures ANOVA will be used to compare QOL between two arms.

### **Implications for research**

The current study aims to assess the benefit of NACRT over chemotherapy alone in terms of OS in locally advanced GBC. If proven to be effective, it would redefine the current standard of care for these patients.

Funding: The study is funded by intramural grant supported by the institution where it is being conducted.

Conflicts of Interest-None of the authors have conflicting interests.

### **References**

1. de Groen PC, Gores GJ et al. Biliary tract cancers. *The New England journal of medicine*. 1999 Oct 28;341(18):1368-78.
2. Misra S, Chaturvedi A, Misra NC, Sharma ID. Carcinoma of the gallbladder. *The lancet oncology*. 2003 Mar 31;4(3):167-76.
3. Jin LX, Pitt SC, Hall BL, Pitt HA. Aggressive surgical management of gallbladder cancer: At what cost? *Surgery*. 2013 Aug 31;154(2):266-73.
4. Dixon E, Vollmer Jr CM, Sahajpal A, Cattral M, Grant D, Doig C, Hemming A, Taylor B, Langer B, Greig P, Gallinger S. An aggressive surgical approach leads to improved survival in patients with gallbladder cancer: a 12-year study at a North American Center. *Annals of surgery*. 2005 Mar;241(3):385.
5. Nishio H, Ebata T, Yokoyama Y, Igami T, Sugawara G, Nagino M. Gallbladder cancer involving the extrahepatic bile duct is worthy of resection. *Annals of surgery*. 2011 May 1;253(5):953-60.

6. D'hondt M, Lapointe R, Benamira Z, Pottel H, Plasse M, Letourneau R, Roy A, Dagenais M, Vandembroucke-Menu F. Carcinoma of the gallbladder: patterns of presentation, prognostic factors and survival rate. An 11-year single centre experience. *European Journal of Surgical Oncology*. 2013 Jun 1;39(6):548-53.
7. Sasaki R, Takahashi M, Funato O, Nitta H, Murakami M, Kawamura H, Suto T, Kanno S, Saito K. Hepatopancreatoduodenectomy with wide lymph node dissection for locally advanced carcinoma of the gallbladder--long-term results. *Hepato-gastroenterology*. 2002;49(46):912-5.
8. Araida T, Yoshikawa T, Azuma T, Ota T, Takasaki K, Hanyu F. Indications for pancreatoduodenectomy in patients undergoing lymphadenectomy for advanced gallbladder carcinoma. *Journal of Hepato-Biliary-Pancreatic Sciences*. 2004 Feb 1;11(1):45-9.
9. Birnbaum DJ, Vigano L, Ferrero A, Langella S, Rusolillo N, Capussotti L. Locally advanced gallbladder cancer: which patients benefit from resection? *European Journal of Surgical Oncology*. 2014 Aug 1;40(8):1008-15.
10. Valle J, Wasan H, Palmer DH, Cunningham D, Anthony A, Maraveyas A, Madhusudan S, Iveson T, Hughes S, Pereira SP, Roughton M. Cisplatin plus gemcitabine versus gemcitabine for biliary tract cancer. *New England Journal of Medicine*. 2010 Apr 8;362(14):1273-81.
11. Chaudhari VA, Ostwal V, Patkar S, Sahu A, Toshniwal A, Ramaswamy A, Shetty NS, Shrikhande SV, Goel M. Outcome of neoadjuvant chemotherapy in "locally advanced/borderline resectable" gallbladder cancer: the need to define indications. *HPB*. 2018 Apr 26.
12. Neoadjuvant chemotherapy in patients with locally advanced gallbladder cancer. Sirohi B, Mitra A, Jagannath P, Singh A, Ramadvar M, Kulkarni S, Goel M, Shrikhande SV. *Future Oncol*. 2015;11(10):1501-9
13. Losada H, Mora J, Roa I, Burgos L, Yáñez E, Quijada I, Roa JC. Neoadjuvant chemoradiotherapy in gallbladder cancer. *Revista medica de Chile*. 2004 Jan;132(1):51-7.
14. Morganti AG, Trodella L, Valentini V, Montemaggi P, Costamagna G, Smaniotto D, Luzi S, Ziccarelli P, Macchia G, Perri V, Mutignani M. Combined modality treatment in unresectable extrahepatic biliary carcinoma. *International Journal of Radiation Oncology\* Biology\* Physics*. 2000 Mar 1;46(4):913-9.
15. Engineer R, Wadasadawala T, Mehta S, Mahantshetty U, Purandare N, Rangarajan V, Shrivastava SK. Chemoradiation for unresectable gallbladder cancer: time to review historic nihilism? *Journal of gastrointestinal cancer*. 2011 Dec 1;42(4):222-7.
16. Engineer R, Goel M, Chopra S, Patil P, Purandare N, Rangarajan V, Ph R, Bal M, Shrikhande S, Shrivastava SK, Mehta S. Neoadjuvant chemoradiation followed by surgery for locally advanced gallbladder cancers: a new paradigm. *Annals of surgical oncology*. 2016 Sep 1;23(9):3009-15.
17. Cited in Scopus: Retrospective Study on the Dosimetric and Clinical Evaluation of Duodenal Toxicity in Those Who Underwent Radiation Therapy for Cancers of the Upper Gastrointestinal Tract and Gynecological Cancers Who Received Extended Field

- 1  
2  
3 Radiotherapy.R. Engineer, S. Sastri, G.J. George. International Journal of Radiation  
4 Oncology • Biology • Physics, Vol. 99, Issue 2, E147  
5  
6 18.Grégoire V, Mackie TR. State of the art on dose prescription, reporting and recording in  
7 Intensity-Modulated Radiation Therapy (ICRU report No. 83). Cancer/Radiothérapie.  
8 2011 Oct 1;15(6-7):555-9.  
9  
10 19.Eisenhauer EA, Therasse P, Bogaerts J, Schwartz LH, Sargent D, Ford R, Dancey J,  
11 Arbuck S, Gwyther S, Mooney M, Rubinstein L. New response evaluation criteria in  
12 solid tumours: revised RECIST guideline (version 1.1). European journal of cancer. 2009  
13 Jan 1;45(2):228-47.  
14  
15 20.Dindo D, Demartines N, Clavien PA. Classification of surgical complications: a new  
16 proposal with evaluation in a cohort of 6336 patients and results of a survey. Annals of  
17 surgery. 2004 Aug;240(2):205.  
18  
19

### Authors' Contributions

22 Engineer R. is the Principal Investigator and participated in project concept, design, final  
23 approval and manuscript preparation, review and submission.  
24

25 Patkar S. participated in final approval of protocol, manuscript preparation and manuscript  
26 review and submission.  
27

28 Lewis S. participated in review of protocol, final approval of protocol, manuscript preparation.  
29

30 Sharma A.D. participated in manuscript preparation, review of manuscript and submission.  
31

32 Shetty N. participated in final approval of draft, review of manuscript, preparation of manuscript.  
33

34 Ostwal V. participated in review of manuscript for content, review and preparation of  
35 manuscript, submission of final protocol and final approval.  
36

37 Ramaswamy A. participated in review and preparation of manuscript, preparation of trial  
38 protocol and final approval of trial protocol.  
39

40 Chopra S. participated in drafting final protocol, review of contents of the protocol, manuscript  
41 preparation and final approval.  
42

43 Agrawal A. participated in manuscript preparation, review of final protocol and approval of final  
44 protocol draft.  
45

46 Patil P. participated in concept and design, preparation of manuscript, review of manuscript,  
47 final approval of trial protocol.  
48

49 Mehta S. participated in review of manuscript, manuscript preparation, drafting of final report  
50 and final approval.  
51

52 Goel M. (Co-PI of the study) participated in concept and design, review of manuscript,  
53 manuscript preparation and drafting of final report and final approval of trial protocol.  
54  
55  
56  
57  
58  
59  
60

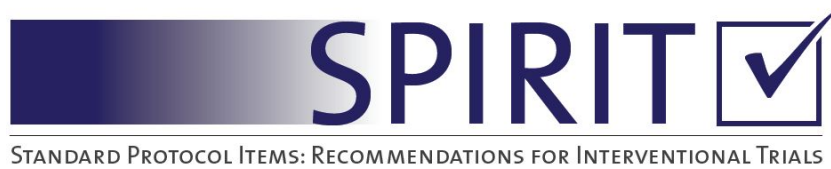

STANDARD PROTOCOL ITEMS: RECOMMENDATIONS FOR INTERVENTIONAL TRIALS

SPIRIT 2013 Checklist: Recommended items to address in a clinical trial protocol and related documents\*

| Section/item                      | Item No | Description                                                                                                                                                                                                                                  |
|-----------------------------------|---------|----------------------------------------------------------------------------------------------------------------------------------------------------------------------------------------------------------------------------------------------|
| <b>Administrative information</b> |         |                                                                                                                                                                                                                                              |
| Title                             | 1       | A Phase III Randomized Clinical trial of Perioperative therapy (Neoadjuvant chemotherapy v/s chemoradiotherapy) in locally advanced gall bladder cancers (POLCAGB) - Study Protocol                                                          |
| Trial registration                | 2a      | ClinicalTrials.gov ( NCT02867865)                                                                                                                                                                                                            |
|                                   | 2b      | Not applicable                                                                                                                                                                                                                               |
| Protocol version                  | 3       | Date - 18th March 2016, version 2                                                                                                                                                                                                            |
| Funding                           | 4       | Intramural grant from host institution – Tata Memorial centre                                                                                                                                                                                |
| Roles and responsibilities        | 5a      | Written on page 16 & 17                                                                                                                                                                                                                      |
|                                   | 5b      | Dr R A Badwe, Director Tata Memorial Hospital                                                                                                                                                                                                |
|                                   | 5c      | Not Applicable                                                                                                                                                                                                                               |
|                                   | 5d      | The Tata Memorial centre would be responsible for the overall conduct of the trial. The results would be presented to the Institutional ethics committee (IEC) and IRB (Institutional review board) and data and safety monitoring committee |
| <b>Introduction</b>               |         |                                                                                                                                                                                                                                              |
| Background and rationale          | 6a      | Written on page 4 & 5                                                                                                                                                                                                                        |
|                                   | 6b      | Page 5                                                                                                                                                                                                                                       |
| Objectives                        | 7       | Page 5 & 11                                                                                                                                                                                                                                  |
| Trial design                      | 8       | Page 5                                                                                                                                                                                                                                       |

**Methods: Participants, interventions, and outcomes**

|                      |     |                                                                                                                         |
|----------------------|-----|-------------------------------------------------------------------------------------------------------------------------|
| Study setting        | 9   | Page 5 - Tata Memorial centre and other centres in Northern India                                                       |
| Eligibility criteria | 10  | Page 6 & 7                                                                                                              |
| Interventions        | 11a | Page 7 & 8                                                                                                              |
|                      | 11b | Page 7 & 8                                                                                                              |
|                      | 11c | Page 7 & 8                                                                                                              |
|                      | 11d | Page 7 & 8                                                                                                              |
| Outcomes             | 12  | Page 11                                                                                                                 |
| Participant timeline | 13  | Page 9                                                                                                                  |
| Sample size          | 14  | Page 12                                                                                                                 |
| Recruitment          | 15  | To improve the accrual rate the study has been made multicentric and is open to any centres interested in participation |

**Methods: Assignment of interventions (for controlled trials)**

## Allocation:

|                                  |     |                |
|----------------------------------|-----|----------------|
| Sequence generation              | 16a | Page 5         |
| Allocation concealment mechanism | 16b | Not applicable |
| Implementation                   | 16c | Page 5         |
| Blinding (masking)               | 17a | Not applicable |
|                                  | 17b | Not applicable |

**Methods: Data collection, management, and analysis**

|                         |     |              |
|-------------------------|-----|--------------|
| Data collection methods | 18a | Page 12 & 13 |
|                         | 18b | Page 13 & 14 |
| Data management         | 19  | Page 13      |
| Statistical methods     | 20a | Page 14      |
|                         | 20b | Page 14      |

1  
2  
3  
4  
5  
6  
7  
8  
9  
10  
11  
12  
13  
14  
15  
16  
17  
18  
19  
20  
21  
22  
23  
24  
25  
26  
27  
28  
29  
30  
31  
32  
33  
34  
35  
36  
37  
38  
39  
40  
41  
42  
43  
44  
45  
46  
47  
48  
49  
50  
51  
52  
53  
54  
55  
56  
57  
58  
59  
60

20c Page 13

### Methods: Monitoring

Data monitoring 21a The hospital data and safety monitoring committee (DSMC); is independent from the sponsor and competing interests. The details of can be found on our website [www.tmc.gov.in](http://www.tmc.gov.in) It monitors all serious adverse events and overall conduct of the trial as per the GCP guidelines.

21b No interim analysis has been planned for this study

Harms 22 Page 13

Auditing 23 A thorough monitoring of all the accrued cases is done annually by its members independent from investigators to the study.

### Ethics and dissemination

Research ethics approval 24 The study was submitted for the Human ethics committee and institutional review board (IRB) and the approval was obtained on 10/05/2016

Protocol amendments 25 No amendments to the protocol have been done. In future if there is any amendment it will be informed to the relevant parties (eg, investigators, IRB, trial participants, trial registries, journals, regulators)

Consent or assent 26a Page 5  
An informed consent would be obtained from the patients by any of the investigators in this study.

26b Not applicable

Confidentiality 27 All measures would be taken to protect the confidentiality of the patients, before, during, and after the trial

Declaration of interests 28 All investigators declare that they have no financial and other competing interests for the overall trial and each study site

Access to data 29 The principal investigator and the IRB will have access to the final trial dataset, and there is no disclosure of contractual agreements that limit such access for investigators

Ancillary and post-trial care 30 Provisions for ancillary and post-trial care, and for compensation to those who suffer harm from trial participation have been accounted for in the budget sheet of this study.

Dissemination policy 31a Investigators do plan to communicate trial results to participants, healthcare professionals, the public, and other relevant groups (eg, via publication, reporting in results databases, or other data sharing arrangements).

- 1  
2 31b Authorship to the final manuscript will be as per the ICMJE criteria.  
3 We do not intend to use professional writers  
4  
5 31c Not applicable  
6

## 7 **Appendices**

- 8  
9 Informed consent 32 Model consent form and other related documentation given to  
10 materials participants and authorised surrogates (Attached)  
11  
12 Biological 33 Not applicable  
13 specimens  
14

---

15 \*It is strongly recommended that this checklist be read in conjunction with the SPIRIT 2013  
16 Explanation & Elaboration for important clarification on the items. Amendments to the  
17 protocol should be tracked and dated. The SPIRIT checklist is copyrighted by the SPIRIT  
18 Group under the Creative Commons "[Attribution-NonCommercial-NoDerivs 3.0 Unported](#)"  
19 license.  
20  
21  
22  
23  
24  
25  
26  
27  
28  
29  
30  
31  
32  
33  
34  
35  
36  
37  
38  
39  
40  
41  
42  
43  
44  
45  
46  
47  
48  
49  
50  
51  
52  
53  
54  
55  
56  
57  
58  
59  
60



# BMJ Open

## A Phase III Randomized Clinical trial of Perioperative therapy (Neoadjuvant chemotherapy v/s chemoradiotherapy) in locally advanced gall bladder cancers(POLCAGB) - Study Protocol

|                                 |                                                                                                                                                                                                                                                                                                                                                                                                                                                                                                                                                                                                                                                                                                                                                                                                                                                                                                                           |
|---------------------------------|---------------------------------------------------------------------------------------------------------------------------------------------------------------------------------------------------------------------------------------------------------------------------------------------------------------------------------------------------------------------------------------------------------------------------------------------------------------------------------------------------------------------------------------------------------------------------------------------------------------------------------------------------------------------------------------------------------------------------------------------------------------------------------------------------------------------------------------------------------------------------------------------------------------------------|
| Journal:                        | <i>BMJ Open</i>                                                                                                                                                                                                                                                                                                                                                                                                                                                                                                                                                                                                                                                                                                                                                                                                                                                                                                           |
| Manuscript ID                   | bmjopen-2018-028147.R2                                                                                                                                                                                                                                                                                                                                                                                                                                                                                                                                                                                                                                                                                                                                                                                                                                                                                                    |
| Article Type:                   | Protocol                                                                                                                                                                                                                                                                                                                                                                                                                                                                                                                                                                                                                                                                                                                                                                                                                                                                                                                  |
| Date Submitted by the Author:   | 17-May-2019                                                                                                                                                                                                                                                                                                                                                                                                                                                                                                                                                                                                                                                                                                                                                                                                                                                                                                               |
| Complete List of Authors:       | Engineer, Reena; Tata Memorial Centre<br>Patkar, Shraddha; Tata Memorial Centre, Department of Surgical Oncology<br>Lewis, Shirley; Tata Memorial Hospital, Radiation Oncology<br>Sharma, Ashutosh; Tata Memorial Centre, radiation oncology;<br>Shetty, Nitin ; Tata Memorial Centre, Department of Radiodiagnosis<br>Ostwal, Vikas; Tata Memorial Centre, Department of Medical Oncology, GastroIntestinal Disease Management Group<br>Ramaswamy, Anant; Tata Memorial Centre, Department of Medical Oncology, Gastrointestinal Disease Management Group<br>Chopra, Supriya; Tata Memorial Centre<br>Agrawal, Archi; Tata Memorial Hospital, Nuclear Medicine<br>Patil, Prachi; Tata Memorial Centre, Department of Digestive Diseases and Clinical Nutrition<br>Mehta, Shaesta; Tata Memorial Centre, Department of Digestive Diseases and Clinical Nutrition<br>Goel, Mahesh; Tata Memorial Centre, Surgical Oncology |
| <b>Primary Subject Heading</b>: | Oncology                                                                                                                                                                                                                                                                                                                                                                                                                                                                                                                                                                                                                                                                                                                                                                                                                                                                                                                  |
| Secondary Subject Heading:      | Gastroenterology and hepatology, Oncology, Surgery                                                                                                                                                                                                                                                                                                                                                                                                                                                                                                                                                                                                                                                                                                                                                                                                                                                                        |
| Keywords:                       | Radiation oncology < RADIOTHERAPY, Hepatobiliary tumours < ONCOLOGY, Gastrointestinal tumours < ONCOLOGY, Hepatobiliary surgery < SURGERY, Clinical trials < THERAPEUTICS                                                                                                                                                                                                                                                                                                                                                                                                                                                                                                                                                                                                                                                                                                                                                 |
|                                 |                                                                                                                                                                                                                                                                                                                                                                                                                                                                                                                                                                                                                                                                                                                                                                                                                                                                                                                           |

SCHOLARONE™  
Manuscripts

1  
2  
3  
4  
5  
6  
7  
8  
9  
10  
11  
12  
13  
14  
15  
16  
17  
18  
19  
20  
21  
22  
23  
24  
25  
26  
27  
28  
29  
30  
31  
32  
33  
34  
35  
36  
37  
38  
39  
40  
41  
42  
43  
44  
45  
46  
47  
48  
49  
50  
51  
52  
53  
54  
55  
56  
57  
58  
59  
60

**Title page**

**A Phase III Randomized Clinical trial of Perioperative therapy (Neoadjuvant chemotherapy v/s chemoradiotherapy) in locally advanced gall bladder cancers (POLCAGB) - Study Protocol**

Reena Engineer<sup>1</sup>, Shraddha Patkar<sup>2</sup>, Shirley Lewis<sup>1</sup>, Ashutosh Das Sharma<sup>1</sup>, Nitin Shetty<sup>3</sup>, Vikas Ostwal<sup>4</sup>, Anant Ramaswamy<sup>4</sup>, Supriya Chopra<sup>5</sup>, Archi Agrawal<sup>6</sup>, Prachi Patil<sup>7</sup>, Shaesta Mehta<sup>7</sup>, Mahesh Goel<sup>2</sup>

1- Department of Radiation Oncology, Tata Memorial Hospital, Mumbai, India

2- Department of Surgical Oncology, Tata Memorial Hospital, Mumbai, India

3- Department of Radiodiagnosis, Tata Memorial Hospital, Mumbai, India

4- Department of Medical Oncology, Tata Memorial Hospital, Mumbai, India

5- Department of Radiation Oncology, ACTREC, Tata Memorial Centre, Mumbai, India

6- Department of Nuclear Medicine, Tata Memorial Hospital, Mumbai, India

7- Department of Digestive Diseases and Clinical Nutrition, Tata Memorial Hospital, Mumbai, India

**Corresponding author** Reena Engineer

Room no. 322

Tata Memorial Hospital

Dr.E. Borgese Road

Lower Parel

Mumbai, MH

India

+912224177000(ext-7165)

[Email-reena.engineer@gmail.com](mailto:reena.engineer@gmail.com)

**Key words:** Radiation oncology, Hepatobiliary tumours, Gastrointestinal tumours, Hepatobiliary surgery, Clinical trials

**Running Title:** Perioperative therapy in Locally Advanced GBC, A phase 3 RCT

**Word Count:** 3157

## Main Document

# **A Phase III Randomized Clinical trial of Perioperative therapy (Neoadjuvant chemotherapy v/s chemoradiotherapy) in locally advanced gall bladder cancers (POLCAGB) - Study Protocol**

## **ABSTRACT**

### **Introduction:**

Neoadjuvant chemotherapy is considered the current standard for locally advanced gallbladder cancer. There is no consensus on the optimal neoadjuvant approach. A pilot study from our institution has shown improved overall survival and progression free survival with neoadjuvant chemoradiation. The present randomized phase 3 trial is designed to compare neoadjuvant chemoradiation with neoadjuvant chemotherapy alone and will test the superiority of chemoradiation in terms of tumor downstaging and improvement in overall survival.

### **Methods and analysis:**

Patients with biopsy proven locally advanced gallbladder cancer (T3-4) with predefined clinic-radiological features will be randomized to gemcitabine-based chemotherapy alone arm or chemoradiation arm. Patients with resectable disease or with distant metastases will be excluded. The primary end point of the study is to compare overall survival between the two arms. The secondary end points are to compare progression free survival, R0 resection rates, acute and late toxicity, postoperative complications, and quality of life between two study arms. The trial is designed to detect an improvement in median overall survival by 5.5 months in the study arm(11 months in control group; Hazard ratio of 0.7) with 80.0% power at a 0.05 significance level. The resultant sample size to achieve this aim is 314 (157 in each arm) over a duration of 5 years with a 10% attrition rate.

### **Ethics and Dissemination:**

The institutional ethics committee has approved this trial and will be routinely monitoring the trial at frequent intervals. The results of the study will be disseminated via peer reviewed scientific journals, conference presentations and submission to regulatory authorities.

**Registration:**

The trial is registered with Clinical Trials Registry India (CTRI/2016/08/007199) and ClinicalTrials.gov ( NCT02867865)

This trial aims to assess the superiority of neoadjuvant chemoradiation over neoadjuvant chemotherapy in locally advanced gallbladder cancers in terms of improvement in overall survival.

-The results of this study will define the optimal neoadjuvant approach in locally advanced gallbladder cancer

**Strengths and limitations of the study:**

Strengths of this study are:

1-This is the first randomized study evaluating chemoradiation in the neoadjuvant setting.

2-Treatment of locally advanced GBC is not standardized and this trial will give an opportunity to do so.

The limitations of this study are:

1-Slower recruitment of patients- As majority of patients with GBC in population present late in the course of the disease, a large fraction of the screened patients turn out to be metastatic or with advanced disease that do not meet the stringent inclusion criteria for the trial. This has resulted in low enrolment into the study.

2-Compliance of patients- The long treatment time (>6 months) combined with the socioeconomic restrictions of the majority of the population makes it challenging for the patients to stick to the advised care resulting in financial burden and subsequently increased susceptibility of drop out and loss of follow up.

3-As the treatment is decided and delivered by a large team of physicians that consists of radiologists, gastroenterologist, oncosurgeons, medical oncologists and radiation oncologists, the coordination of the team becomes challenging.

## Introduction

Gallbladder cancer (GBC) is the most common malignancy of the biliary tract [1]. Its incidence is alarmingly high in Chile, Japan, and northern India [2]. Complete surgical excision is the standard of care for early stage GBC. Unfortunately, majority of the cases are diagnosed at an advanced or metastatic stage and only 10–30% of the patient present with resectable disease [2].

GBC with liver infiltration, with or without visceral/vascular infiltration, or having large local lymph node metastases in the absence of distant metastases are generally considered as locally advanced. Prognosis for locally advanced disease in terms of resectability and survival remains dismal in most of the reports [3]. Even with aggressive surgery like extrahepatic bile duct resection or pancreaticoduodenectomy, the 5-year survival rate for stage III disease at best ranges from 30% to 42%. These results are often not reproducible in routine clinical practice [4-9].

Locally advanced GBC, where surgery is not possible, are treated with chemotherapy alone as the current standard of care. In ABC02 trial by Valle et al, neoadjuvant chemotherapy (NACT) with gemcitabine and cisplatin was found to be superior to gemcitabine alone in terms of local tumor response [10]. Some locally advanced non-metastatic GBC do get down-staged to undergo resection following NACT. In a publication from our institute, gemcitabine/cisplatin based NACT alone resulted in R0 resection rate of 46% and median overall survival (OS) and progression free survival (PFS) of 13.4 months and 8.1 months respectively [11].

Few studies have reported the outcomes of neoadjuvant chemoradiation (NACRT) with limited success [12-13]. In an earlier report, we published the outcomes of 3 patients with unresectable tumors, 2 of which were down staged to undergo R0 resection with high dose NACRT [14]. In a pilot study of 28 patients conducted at our center, treated with NACRT, 47% of the patients underwent R0 resections with median OS and PFS being 35 and 20 months respectively [15].

There is no consensus on the optimal neoadjuvant approach in locally advanced GBCA. However, most of the treating physicians prefer to use NACT alone followed by surgical resection if down staging is achieved. The present randomized trial is designed to compare NACRT against NACT alone and will test the superiority of one over the other in terms of down staging and prolonging survival.

## Methods and analysis

### Hypothesis

On the basis of encouraging results obtained with NACRT, we hypothesize that NACRT and additional chemotherapy will improve OS compared to NACT alone in locally advanced GBCA.

### Study aim

The primary aim of the study is to compare the OS between the patients treated with NACT alone vs NACRT. The secondary aims are to compare the R0 surgical resection rate, PFS, acute and late toxicity, postoperative complications, and quality of life between two study arms.

### Study Design

This study is a Phase III randomized control trial designed to compare the OS between the two neoadjuvant treatment arms. All patients with diagnosis of non-metastatic locally advanced GBCA who fulfill the study eligibility criteria will be evaluated for participation in the study. Patients will undergo upfront randomization into one of the study arms (neoadjuvant chemotherapy or chemoradiation) using permuted block stratified randomization. Stratification will be done according the T stage (T1-4). All randomization will be done through clinical research secretariat (CRS) at Tata Memorial Hospital (TMH).

### Research Setting

The study will be conducted at TMH, Tata Memorial Centre(TMC), and Advanced Centre for Treatment Research and Education(ACTREC), Mumbai, India and other collaborating centers.

### Patients and Public Involvement

This research was conceived without patient and public involvement. Patient and public were not invited at any stage of the study design or initiation.

### Screening

All patients will be screened for distant metastases at baseline (prior to randomization) using Positron Emission Tomography and contrast enhanced Computed tomography (PET-CECT) scan.

1  
2  
3 Patients found to be non-metastatic will be subjected to staging laparoscopy to rule out peritoneal  
4 metastases. A tissue diagnosis from the primary would be done by either biopsy or fine needle  
5 aspiration cytology.  
6  
7

### 8 9 **Participants Eligibility:**

#### 10 11 **Inclusion Criteria**

12  
13 Patient older than 18 years of age with histologically proven diagnosis of locally advanced GBCA  
14 (adenocarcinoma) T3 or T4 tumors with one or more of the following criteria will be included in  
15 the trial.  
16  
17  
18

- 19  
20 1. Liver invasion: more than 2 cm but less than 5 cm.
- 21  
22 2. Radiological involvement of antropyloric region of stomach, duodenum, hepatic  
23 flexure of colon or small intestine, but without infiltration of the mucosa on endoscopy.
- 24  
25 3. Type I/II invasion –Involvement of bile duct (common hepatic duct or proximal 1/3 of  
26 the common bile duct) on percutaneous transhepatic biliary drainage (PTBD)/Magnetic  
27 resonance cholangiopancreatography (MRCP) causing obstructive jaundice.
- 28  
29 4. Radiological suspicion of regional lymph node involvement along hepatic artery,  
30 hepatoduodenal ligament, retropancreatic/retroduodenal: size>1cm in short axis, round  
31 in shape and heterogeneous enhancement on PET scan.
- 32  
33 5. Vascular involvement: impingement/ involvement (<180-degree angle) of one or more  
34 of the following blood vessels: common hepatic artery/right hepatic artery/main portal  
35 vein/right portal vein (stage III disease).
- 36  
37 6. Patient who have undergone prior cholecystectomy having residual disease with at least  
38 one of the above features.
- 39  
40 7. The patients must have good general condition (ECOG 0-2).
- 41  
42 8. Normal hematological, renal and hepatic functions done no earlier than 2 weeks prior  
43 to treatment initiation.  
44  
45  
46  
47  
48  
49  
50  
51  
52  
53  
54  
55  
56  
57  
58  
59  
60

### **Exclusion criteria**

Those patients with resectable disease or with evidence of distant metastasis (liver, lung, peritoneum, port site) are excluded from the study. Patients with involvement of the major part of the liver that restricts delivery of full RT doses and those that have received prior radiation or chemotherapy are deemed ineligible to participate in the trial. Patients with evidence of active cholangitis or unresolved biliary obstruction will be excluded.

**Informed consent** – any of the investigators or coinvestigators or a research officer/nurse of this trial can obtain informed consent or assent from potential trial participants or authorised surrogates. The consent form will be given at least 2 days prior to randomization. All efforts would be taken to keep their confidentiality.

### **Study interventions**

#### **NACT alone arm (Standard Arm)**

Patients randomized to NACT alone arm will proceed to receive four cycles of gemcitabine (1000 mg/m<sup>2</sup>) delivered on day 1 and 8 every 3 weeks along with cisplatin (25 mg/m<sup>2</sup>) on day 1. Patients will be assessed for response and evaluated for surgical resection using PET-CECT scan after four cycles of chemotherapy. If the scans show stable but unresectable disease, then patients will continue to receive same chemotherapy. Patients showing locally progressive/systemic disease may be considered for either second line palliative chemotherapy or best supportive care. The use of radical dose chemoradiation is not allowed on disease progression in this arm. However, palliative radiation of 20-25 Gy in 4-5 fractions may be used.

Prior to each cycle of chemotherapy, assessment of hematological, renal and hepatic functions will be done. Patients with creatinine clearance >50 ml/min cisplatin will be administered at a dose of 25 mg/m<sup>2</sup>. In case of creatinine clearance between 40 and 50 ml/min, either substitution with oxaliplatin or 20–25% dose reduction may be applied. Gemcitabine+cisplatin or gemcitabine+oxaliplatin is used and dose modification is done as decided by the medical oncologist's decision as per standard oncological guidelines.



## **NACRT arm (Experimental Arm)**

Patients randomized to NACRT arm will undergo radiation therapy for five weeks with concurrent gemcitabine-based chemotherapy (300 mg/m<sup>2</sup> weekly) followed by two cycles of gemcitabine + cisplatin systemic chemotherapy. The dose and schedule for gemcitabine + cisplatin chemotherapy would be same as standard arm. The chemotherapy would start 3 weeks after completion of radiation.

## **Radiotherapy planning and contouring**

### **Simulation**

The planning CECT scan will be done in fasting state with patient in supine position with arms over head and a knee rest. Immobilization device such as vacuum bags or thermoplastic masks will be used. Fiducials will be placed at the laser intersection points at the level of xiphisternum. The scan will be taken from the level of carina to L4-5 level with 2.5 mm inter slice thickness in the portal phase of intravenous contrast. Respiratory motion management technique like 4DCT or deep inspiratory breath hold technique may be considered.

### **Contouring**

The gross tumor volume (GTV) will be delineated using the information from all available imaging such as the diagnostic triphasic CECT and PET scan and it will be fused with planning scan. It will include the primary and involved locoregional lymph nodes. The Clinical Target Volume (CTV) consists of the adjacent areas of suspected microscopic disease in the surrounding liver parenchyma and the draining locoregional lymph nodes at pericoledochal, cystic duct, retro-portal, along the common hepatic artery, along the hepatoduodenal ligament, pancreaticoduodenal, hilar, periportal, portacaval, and retro-pancreatic region. The planning target volume (PTV) will be generated by adding a safety margin of 5-7 mm around the CTV to counter motion and set-up variations. The aim will be to deliver 52-57 Gy/25 fractions to the gross disease and 45 Gy/25 fractions to the suspected microscopic disease along with weekly gemcitabine (300 mg/m<sup>2</sup>).

Organ at risk (OAR) contouring will include liver, esophagus, stomach, duodenum, kidneys, heart, lungs, bowel and spinal cord. All care will be taken to restrict OAR doses as per standard guidelines. The dose constraints for the OAR is as follows: 70% of the liver <30 Gy, mean liver

dose <25 Gy, 70% of each kidney to receive <20 Gy, mean dose <18 Gy for each kidney. V15 of the small bowel < 190cc and for duodenum: V55<1 cc, V50< 4 cc<sup>[16]</sup>. Special focus will be given to restrict dose to normal liver parenchyma and adjacent gastrointestinal structures such as duodenum to minimize radiation induced grade III or higher toxicity.

### **Radiation plan**

All patients will be treated with IMRT (Rapidarc or Tomotherapy). Dose –volume histograms will be evaluated for target volume coverage and normal tissue-sparing according to standard IMRT plan evaluation indices<sup>[17]</sup>. It will be ensured that 95% of the target volume receives at least 95% of the prescribed dose. Volumes of hotspots (>107% of the prescription dose) will be kept as low as possible throughout the treatment volume. Patient specific quality assurance of the approved dose plan will be done prior to RT starting.

### **Treatment Delivery and Monitoring**

Treatment will be delivered with daily megavoltage/kilo-voltage CT imaging to ensure adequate PTV coverage. All patients will be prescribed prophylactic antacids and mucosal coating agent from day one of radiation starting as a measure to prevent duodenal toxicity. Hematological, hepatic and renal function as well as tolerance to the treatment will be assessed weekly during NACRT. Toxicity will be recorded as per National Cancer Institute Common Terminology Criteria (CTCAE) Version 4.2 at baseline and weekly during NACRT.

### **Efficacy and safety Assessments**

During week 12-13 of starting the treatment, PET CECT scan will be repeated and compared with the initial scans for response assessment using the Response evaluation criteria in solid tumors (RECIST) (version 1.1) criteria<sup>[18]</sup>. The response of the therapy will be assessed in terms of:

Complete Response (CR): disappearance of all target lesions. Any pathological lymph nodes (whether target or non-target) must have reduction in short axis to <10 mm.

Partial Response (PR): At least a 30% decrease in the sum of diameters of target lesions.

1  
2  
3 Progressive Disease (PD): At least a 20% increase in the sum of diameters of target lesions or  
4 appearance or one or more lesions. In addition to the relative increase of 20%, the sum must also  
5 demonstrate an absolute increase of at least 5 mm.  
6  
7

8  
9 Stable Disease (SD): Neither sufficient shrinkage to qualify for PR/CR nor sufficient increase to  
10 qualify for PD.  
11  
12

### 13 **Surgery**

14  
15  
16 All patients with a CR, PR or SD will be re-evaluated for feasibility of surgery after at least 3  
17 weeks of completion of all neoadjuvant therapy in both arms. Surgical resection, if considered  
18 feasible, will be done between weeks 14 and 15 after starting of neoadjuvant therapy. The decision  
19 regarding surgery will be taken by a hepatobiliary surgical oncology consultant. Surgical resection  
20 will entail en bloc resection of the gallbladder with a wedge excision of liver/ segment IVb/V  
21 excision with an aim to achieve negative margin and complete periportal lymphadenectomy  
22 (stations 8,12,13) along with sampling of inter aortocaval nodes to detect occult metastasis.  
23 Additional organ resection may be performed if necessitated to achieve R0 status as guided by  
24 intraoperative frozen section. Performance of extended resections like pancreatoduodenectomy or  
25 major hepatectomy to achieve negative margins will be left to the discretion of operating surgeon.  
26 Complications following surgery will be recorded as per the Clavien-Dindo grading system<sup>[19]</sup>.  
27  
28  
29  
30  
31  
32  
33  
34  
35

### 36 **Adjuvant Therapy**

37  
38 All the patients after surgery will receive 3 cycles of adjuvant chemotherapy with gemcitabine  
39 (1000mg/m<sup>2</sup>) day one and eight and cisplatin (25 mg/m<sup>2</sup>) day 1 delivered every three weeks.  
40 Patients with progressive disease and those with CR/PR/SD, not eligible for surgery will be  
41 evaluated for second line palliative chemotherapy or best supportive care.  
42  
43  
44  
45

### 46 **Treatment Evaluation**

47  
48 CTCAE Version 4.2 will be used for reporting all acute and late toxicities. Adverse events (AEs)  
49 in both the arms will be graded using the CTCAE Version 4.2. Toxicity profile for  
50 thrombocytopenia, neutropenia, fatigue, neuropathy, vomiting, flu-like syndrome, hepatic  
51 dysfunction, gemcitabine induced rash and febrile neutropenia will be recorded. Grade 3 or more  
52 thrombocytopenia and vomiting is dose limiting toxicity and warrants a dose reduction of 25%. If  
53  
54  
55  
56  
57

grade 3 or more toxicities are observed during radiotherapy, concurrent gemcitabine dose will be withheld for a week.

Quality of Life (QOL): FACT-Hep version 4 will be used to assess QOL scores of all 5 modules of Physical well-being, Social/Family well-being, Emotional well-being, Functional well-being and hepatobiliary functions related specific questions. It will be done at baseline, at completion of all neoadjuvant treatment (prior to surgery), at treatment completion and at all follow up time points.

### **Follow Up**

Patients will be evaluated every 3 months for a period of 2 years with routine complete hemogram and biochemistry along with ultrasound abdomen and pelvis on each follow up and thereafter every 6 months. QOL with FACT Hep will be filled on every follow up.

### **Statistical Considerations**

#### **Outcome measures**

Following outcome measures would be recorded.

OS: Time interval between the date of first neoadjuvant treatment and death due to any cause.

PFS: Time interval between the date of randomization and loco regional or distant disease progression or death from any cause.

R0 surgical resection rate: Negative surgical margin (R0) rate as determined by intraoperative frozen section. However, final confirmation of margin status on histopathology report of the specimen would be done.

R1 resection: Microscopic positive margin on histopathology.

R 2 resection: Presence of gross residual disease or tumor spillage during surgery.

The number of patients down-staged by neoadjuvant treatment in either arm enabling a margin negative surgical resection will be documented.

1  
2  
3 Response rate: Response to treatment will be assessed with PET-CECT scan using the RECIST  
4 criteria as mentioned previously. Pathological response rate in both arms would also be assessed.  
5  
6

### 7 **Primary endpoint**

8  
9  
10 The primary end point of the study is the overall survival (OS). The estimated median OS in control  
11 group is 11 months with an expected increase of median OS of 16.5 months in the study arm. The  
12 sample size is 286 subjects (143 in each arm) with 80.0% power at a 0.05 two-sided significance  
13 level to detect a hazard ratio of 0.7 when the control group median OS has a hazard ratio of 1. With  
14 10% expected lost to follow up in both groups, we will accrue 314 patients (157 in each arm) for  
15 the whole study. The study duration is 60 months, of which subject accrual will be done in the first  
16 36 months. The accrual pattern across time periods is uniform (all periods equal). To improve  
17 accrual other centers will be encouraged to participate in this study.  
18  
19  
20  
21  
22  
23

### 24 **Data collection**

25  
26  
27 All the data related to the study will be collected and maintained by the principal investigator at  
28 the TMH, Mumbai.  
29  
30

### 31 **Treatment planning data**

32  
33  
34 The volume, mean, median, and maximum radiation dose to PTV, duodenum, liver, stomach, both  
35 the kidneys and the bowel will be recorded for each patient. In addition, V30 liver, V20 kidney,  
36 V15 small bowel and V45, V50, V55 of duodenum will be recorded.  
37  
38  
39

### 40 **Treatment data**

41  
42  
43 Data of all the treatment received will be compiled to report the dose of radiation to target and  
44 OAR, overall time of treatment, treatment gaps if any, chemotherapy dose, dose reductions.  
45 surgical outcomes and post-operative complications.  
46  
47  
48

### 49 **Toxicity evaluation**

50  
51 Treatment related toxicity will be reported using CTCAE V.4.2. CTCAE forms will be filled at  
52 baseline before starting radiation, weekly during treatment and on each scheduled follow-up. If  
53 any toxicity occurs at another time point additional forms will be filled to record the toxicity.  
54  
55  
56  
57  
58  
59  
60

### **Quality of life**

*FACT-Hep* version 4 will be used to assess QOL scores of all 5 modules of Physical well-being, Social/Family well-being, Emotional well-being, Functional well-being and hepatobiliary functions related specific questions. It will be done at baseline, during treatment (at completion of neoadjuvant treatment), at treatment completion and at subsequent follow ups.

### **Clinical outcome data**

Status of the disease will be evaluated with physical examinations and required investigations and recorded at each follow up. A detailed systemic work-up will be performed annually to detect, record and report the locoregional and distant control.

### **Protocol compliance**

Inability to receive the planned treatment as per the protocol (chemotherapy as well as radiation) will be regarded as major violation which will be reported to the institutional review board (IRB). Inability to achieve target or OAR constraints, patient misses 2-3 fractions of RT or 1-2 cycles of concurrent chemotherapy will be considered as minor violation.

### **Event reporting**

All events related to the study will be recorded using CTCAE V.4.2. All serious adverse event (SAE) will be reported. Serious Adverse Events within the test arm will necessitate hospitalization. Toxicity arising out of systemic chemotherapy or patients developing cholangitis will not be considered trial related injury or a related SAE. CTCAE Version 4.2 will be used for reporting of all SAE to the IRB within 24 hours of the occurrence. Similarly, all deaths will be notified to the IRB.

### **Trial monitoring**

The progress of the trial will be monitored at regular interval (Annually) by the institutional data and safety monitoring board and the report will be submitted to the ethics committee and IRB. The process will be independent from investigators and the sponsor

1  
2  
3 **Data analysis plan – No** interim analyses has been planned for this study, however the data  
4 monitoring committee has full authority to stop the trial if it perceives harm to any of the arm of  
5 patients. Intention to treat analysis will be performed along with survival for patients who  
6 undergo surgery in both the groups.  
7  
8  
9

### 10 **Primary aim**

11  
12  
13 Kaplan-Meier curves for OS will be generated for both the arms and OS will be compared using  
14 log-rank test stratified for the stratification factors that were used during randomization (T stage).  
15 A p value of <0.05 will be considered statistically significant and used to reject the null hypothesis.  
16  
17

18  
19 **Secondary aim** A similar Kaplan-Meier analysis will be performed for PFS. Toxicity assessment  
20 will be using categorized groups between two the arms and chi square test will be used. R0 surgical  
21 resection rates and response rates will be calculated within each treatment arm along with exact  
22 95% confidence intervals based on binomial distributions compared between treatment arms using  
23 two-sample Cochran-Mantel-Haenszel test at the 5% level of significance. Rates of Grade III and  
24 IV adverse events will be summarized by treatment arm using descriptive statistics.  
25  
26  
27  
28  
29

### 30 **Ethics and Dissemination:**

31  
32  
33 The institutional ethics committee of Tata Memorial Hospital Mumbai has approved this trial and  
34 will be routinely monitoring the trial at frequent intervals. The results of the study will be  
35 disseminated via peer reviewed scientific journals, conference presentations and submission to  
36 regulatory authorities.  
37  
38  
39  
40  
41  
42

### 43 **QOL analysis**

44  
45 Standard recommendations will be used to analyze QOL data of the two study arms and repeated  
46 measures ANOVA will be used to compare QOL between two arms.  
47  
48  
49

### 50 **Implications for research**

51  
52 The current study aims to assess the benefit of NACRT over chemotherapy alone in terms of OS  
53 in locally advanced GBC. If proven to be effective, it would redefine the current standard of care  
54 for these patients.  
55  
56  
57  
58  
59  
60



Funding: The study is funded by intramural grant supported by the institution where it is being conducted.

Conflicts of interest-None of the authors have conflicting interests.

## References

1. de Groen PC, Gores GJ et al. Biliary tract cancers. *The New England journal of medicine*. 1999 Oct 28;341(18):1368-78.
2. Misra S, Chaturvedi A, Misra NC, Sharma ID. Carcinoma of the gallbladder. *The lancet oncology*. 2003 Mar 31;4(3):167-76.
3. Jin LX, Pitt SC, Hall BL, Pitt HA. Aggressive surgical management of gallbladder cancer: At what cost?. *Surgery*. 2013 Aug 31;154(2):266-73.
4. Dixon E, Vollmer Jr CM, Sahajpal A, Cattral M, Grant D, Doig C, Hemming A, Taylor B, Langer B, Greig P, Gallinger S. An aggressive surgical approach leads to improved survival in patients with gallbladder cancer: a 12-year study at a North American Center. *Annals of surgery*. 2005 Mar;241(3):385.
5. Nishio H, Ebata T, Yokoyama Y, Igami T, Sugawara G, Nagino M. Gallbladder cancer involving the extrahepatic bile duct is worthy of resection. *Annals of surgery*. 2011 May 1;253(5):953-60.
6. D'hondt M, Lapointe R, Benamira Z, Pottel H, Plasse M, Letourneau R, Roy A, Dagenais M, Vandenbroucke-Menu F. Carcinoma of the gallbladder: patterns of presentation, prognostic factors and survival rate. An 11-year single centre experience. *European Journal of Surgical Oncology*. 2013 Jun 1;39(6):548-53.
7. Sasaki R, Takahashi M, Funato O, Nitta H, Murakami M, Kawamura H, Suto T, Kanno S, Saito K. Hepatopancreatoduodenectomy with wide lymph node dissection for locally advanced carcinoma of the gallbladder--long-term results. *Hepato-gastroenterology*. 2002;49(46):912-5.
8. Araida T, Yoshikawa T, Azuma T, Ota T, Takasaki K, Hanyu F. Indications for pancreatoduodenectomy in patients undergoing lymphadenectomy for advanced gallbladder carcinoma. *Journal of Hepato-Biliary-Pancreatic Sciences*. 2004 Feb 1;11(1):45-9.
9. Birnbaum DJ, Vigano L, Ferrero A, Langella S, Russolillo N, Capussotti L. Locally advanced gallbladder cancer: which patients benefit from resection?. *European Journal of Surgical Oncology*. 2014 Aug 1;40(8):1008-15.
10. Valle J, Wasan H, Palmer DH, Cunningham D, Anthony A, Maraveyas A, Madhusudan S, Iveson T, Hughes S, Pereira SP, Roughton M. Cisplatin plus gemcitabine versus gemcitabine for biliary tract cancer. *New England Journal of Medicine*. 2010 Apr 8;362(14):1273-81.



11. Chaudhari VA, Ostwal V, Patkar S, Sahu A, Toshniwal A, Ramaswamy A, Shetty NS, Shrikhande SV, Goel M. Outcome of neoadjuvant chemotherapy in “locally advanced/borderline resectable” gallbladder cancer: the need to define indications. *HPB*. 2018 Apr 26.
12. Losada H, Mora J, Roa I, Burgos L, Yáñez E, Quijada I, Roa JC. Neoadjuvant chemoradiotherapy in gallbladder cancer. *Revista medica de Chile*. 2004 Jan;132(1):51-7.
13. Morganti AG, Trodella L, Valentini V, Montemaggi P, Costamagna G, Smaniotto D, Luzi S, Ziccarelli P, Macchia G, Perri V, Mutignani M. Combined modality treatment in unresectable extrahepatic biliary carcinoma. *International Journal of Radiation Oncology\* Biology\* Physics*. 2000 Mar 1;46(4):913-9.
14. Engineer R, Wadasadawala T, Mehta S, Mahantshetty U, Purandare N, Rangarajan V, Shrivastava SK. Chemoradiation for unresectable gallbladder cancer: time to review historic nihilism?. *Journal of gastrointestinal cancer*. 2011 Dec 1;42(4):222-7.
15. Cited in Scopus: Retrospective Study on the Dosimetric and Clinical Evaluation of Duodenal Toxicity in Those Who Underwent Radiation Therapy for Cancers of the Upper Gastrointestinal Tract and Gynecological Cancers Who Received Extended Field Radiotherapy. R. Engineer, S. Sastri, G.J. George. *International Journal of Radiation Oncology • Biology • Physics*, Vol. 99, Issue 2, E147
16. Engineer R, Goel M, Chopra S, Patil P, Purandare N, Rangarajan V, Ph R, Bal M, Shrikhande S, Shrivastava SK, Mehta S. Neoadjuvant chemoradiation followed by surgery for locally advanced gallbladder cancers: a new paradigm. *Annals of surgical oncology*. 2016 Sep 1;23(9):3009-15.
17. Grégoire V, Mackie TR. State of the art on dose prescription, reporting and recording in Intensity-Modulated Radiation Therapy (ICRU report No. 83). *Cancer/Radiothérapie*. 2011 Oct 1;15(6-7):555-9.
18. Eisenhauer EA, Therasse P, Bogaerts J, Schwartz LH, Sargent D, Ford R, Dancey J, Arbuck S, Gwyther S, Mooney M, Rubinstein L. New response evaluation criteria in solid tumours: revised RECIST guideline (version 1.1). *European journal of cancer*. 2009 Jan 1;45(2):228-47.
19. Dindo D, Demartines N, Clavien PA. Classification of surgical complications: a new proposal with evaluation in a cohort of 6336 patients and results of a survey. *Annals of surgery*. 2004 Aug;240(2):205.

### Authors' Contributions

1  
2  
3  
4  
5 Engineer R. is the Principal Investigator and participated in project concept, design, final  
6 approval and manuscript preparation, review and submission.  
7

8 Patkar S. participated in final approval of protocol, manuscript preparation and manuscript  
9 review and submission.  
10

11 Lewis S. participated in review of protocol, final approval of protocol, manuscript preparation.  
12

13 Sharma A.D. participated in manuscript preparation, review of manuscript and submission.  
14

15 Shetty N. participated in final approval of draft, review of manuscript, preparation of manuscript.  
16

17 Ostwal V. participated in review of manuscript for content, review and preparation of  
18 manuscript, submission of final protocol and final approval.  
19

20 Ramaswamy A. participated in review and preparation of manuscript, preparation of trial  
21 protocol and final approval of trial protocol.  
22

23 Chopra S. participated in drafting final protocol, review of contents of the protocol, manuscript  
24 preparation and final approval.  
25

26 Agrawal A. participated in manuscript preparation, review of final protocol and approval of final  
27 protocol draft.  
28

29 Patil P. participated in concept and design, preparation of manuscript, review of manuscript, final  
30 approval of trial protocol.  
31

32 Mehta S. participated in review of manuscript, manuscript preparation, drafting of final report  
33 and final approval.  
34

35 Goel M (Co-PI). participated in concept and design, review of manuscript, manuscript  
36 preparation and drafting of final report and final approval of trial protocol.  
37  
38  
39  
40

41 Trial sponsor - Dr R A Badwe, Director Tata Memorial Hospital  
42

43 Composition, roles, and responsibilities of the coordinating centre, steering committee, endpoint  
44 adjudication committee, data management team, and other individuals or groups overseeing the  
45 trial  
46

47 We having Institutional ethics committee kindly follow the link below  
48

49 <https://tmc.gov.in/TMH/index.php/institutional-ethics-committees>  
50  
51

52 Composition of data monitoring committee (DMC); Follow the following link  
53

54 <https://tmc.gov.in/TMH/index.php/education-and-research/research/dsm-sub-committee>  
55  
56  
57  
58  
59  
60

1  
2  
3 Any protocol modifications will be submitted and taken permission from the IEC and IRB of the  
4 hospital  
5  
6  
7  
8  
9  
10

### 11 **Declaration of interests**

12  
13 We declare no financial and other competing interests for principal investigators or co-  
14 investigators for the overall trial and each study site  
15  
16

17  
18 **Access to data** – The principal investigator and the study team members will have access to all  
19 the clinical data of patients. After completion of study the raw data will be submitted to TMC  
20 Research Administration Council  
21  
22

### 23 **Ancillary and post-trial care –**

24 Provisions, if any, for ancillary and post-trial care, and for compensation to those who suffer  
25 harm from trial participation has been budgeted for and mentioned in the informed consent form  
26  
27  
28  
29  
30  
31  
32  
33  
34  
35  
36  
37  
38  
39  
40  
41  
42  
43  
44  
45  
46  
47  
48  
49  
50  
51  
52  
53  
54  
55  
56  
57  
58  
59  
60



SPIRIT 2013 Checklist: Recommended items to address in a clinical trial protocol and related documents\*

**Section/item Item No Description**

| <b>Administrative information</b> |    |                                                                                                                                                                                                                                                                                          | <b>Changes by author</b> |
|-----------------------------------|----|------------------------------------------------------------------------------------------------------------------------------------------------------------------------------------------------------------------------------------------------------------------------------------------|--------------------------|
| Title                             | 1  | Descriptive title identifying the study design, population, interventions, and, if applicable, trial acronym                                                                                                                                                                             | Page 1                   |
| Trial registration                | 2a | Trial identifier and registry name. If not yet registered, name of intended registry                                                                                                                                                                                                     | Page 3<br>Line 2         |
|                                   | 2b | All items from the World Health Organization Trial Registration Data Set                                                                                                                                                                                                                 | NA - Not applicable      |
| Protocol version                  | 3  | Date and version identifier                                                                                                                                                                                                                                                              | Page 3                   |
| Funding                           | 4  | Sources and types of financial, material, and other support                                                                                                                                                                                                                              | Page 15                  |
| Roles and responsibilities        | 5a | Names, affiliations, and roles of protocol contributors                                                                                                                                                                                                                                  | Page 17                  |
|                                   | 5b | Name and contact information for the trial sponsor                                                                                                                                                                                                                                       | Page 17                  |
|                                   | 5c | Role of study sponsor and funders, if any, in study design; collection, management, analysis, and interpretation of data; writing of the report; and the decision to submit the report for publication, including whether they will have ultimate authority over any of these activities | NA                       |
|                                   | 5d | Composition, roles, and responsibilities of the coordinating centre, steering committee, endpoint adjudication committee, data management team, and other individuals or groups overseeing the trial, if applicable (see Item 21a for data monitoring committee)                         | Page 17                  |
| <b>Introduction</b>               |    |                                                                                                                                                                                                                                                                                          |                          |
| Background and rationale          | 6a | Description of research question and justification for undertaking the trial, including summary of relevant studies (published and unpublished) examining benefits and harms for each intervention                                                                                       | Page 2 & 4               |

|                                                           |     |                                                                                                                                                                                                                                                                                                                                                                                |            |
|-----------------------------------------------------------|-----|--------------------------------------------------------------------------------------------------------------------------------------------------------------------------------------------------------------------------------------------------------------------------------------------------------------------------------------------------------------------------------|------------|
|                                                           | 6b  | Explanation for choice of comparators                                                                                                                                                                                                                                                                                                                                          | Page 5     |
| Objectives                                                | 7   | Specific objectives or hypotheses                                                                                                                                                                                                                                                                                                                                              | Page 5     |
| Trial design                                              | 8   | Description of trial design including type of trial (eg, parallel group, crossover, factorial, single group), allocation ratio, and framework (eg, superiority, equivalence, noninferiority, exploratory)                                                                                                                                                                      | Page 5     |
| <b>Methods: Participants, interventions, and outcomes</b> |     |                                                                                                                                                                                                                                                                                                                                                                                |            |
| Study setting                                             | 9   | Description of study settings (eg, community clinic, academic hospital) and list of countries where data will be collected. Reference to where list of study sites can be obtained                                                                                                                                                                                             | Page 5     |
| Eligibility criteria                                      | 10  | Inclusion and exclusion criteria for participants. If applicable, eligibility criteria for study centres and individuals who will perform the interventions (eg, surgeons, psychotherapists)                                                                                                                                                                                   | Page 6 & 7 |
| Interventions                                             | 11a | Interventions for each group with sufficient detail to allow replication, including how and when they will be administered                                                                                                                                                                                                                                                     | Page 7     |
|                                                           | 11b | Criteria for discontinuing or modifying allocated interventions for a given trial participant (eg, drug dose change in response to harms, participant request, or improving/worsening disease)                                                                                                                                                                                 | Page 7     |
|                                                           | 11c | Strategies to improve adherence to intervention protocols, and any procedures for monitoring adherence (eg, drug tablet return, laboratory tests)                                                                                                                                                                                                                              | Page 7     |
|                                                           | 11d | Relevant concomitant care and interventions that are permitted or prohibited during the trial                                                                                                                                                                                                                                                                                  | Page 9     |
| Outcomes                                                  | 12  | Primary, secondary, and other outcomes, including the specific measurement variable (eg, systolic blood pressure), analysis metric (eg, change from baseline, final value, time to event), method of aggregation (eg, median, proportion), and time point for each outcome. Explanation of the clinical relevance of chosen efficacy and harm outcomes is strongly recommended | Page 11    |
| Participant timeline                                      | 13  | Time schedule of enrolment, interventions (including any run-ins and washouts), assessments, and visits for participants. A schematic diagram is highly recommended (see Figure)                                                                                                                                                                                               | Page 9     |

|    |                                                                     |     |                                                                                                                                                                                                                                                                                                                                                                                                              |         |
|----|---------------------------------------------------------------------|-----|--------------------------------------------------------------------------------------------------------------------------------------------------------------------------------------------------------------------------------------------------------------------------------------------------------------------------------------------------------------------------------------------------------------|---------|
| 1  | Sample size                                                         | 14  | Estimated number of participants needed to achieve study objectives and how it was determined, including clinical and statistical assumptions supporting any sample size calculations                                                                                                                                                                                                                        | Page 11 |
| 2  |                                                                     |     |                                                                                                                                                                                                                                                                                                                                                                                                              |         |
| 3  |                                                                     |     |                                                                                                                                                                                                                                                                                                                                                                                                              |         |
| 4  |                                                                     |     |                                                                                                                                                                                                                                                                                                                                                                                                              |         |
| 5  |                                                                     |     |                                                                                                                                                                                                                                                                                                                                                                                                              |         |
| 6  |                                                                     |     |                                                                                                                                                                                                                                                                                                                                                                                                              |         |
| 7  | Recruitment                                                         | 15  | Strategies for achieving adequate participant enrolment to reach target sample size                                                                                                                                                                                                                                                                                                                          | Page 12 |
| 8  |                                                                     |     |                                                                                                                                                                                                                                                                                                                                                                                                              |         |
| 9  |                                                                     |     |                                                                                                                                                                                                                                                                                                                                                                                                              |         |
| 10 | <b>Methods: Assignment of interventions (for controlled trials)</b> |     |                                                                                                                                                                                                                                                                                                                                                                                                              |         |
| 11 |                                                                     |     |                                                                                                                                                                                                                                                                                                                                                                                                              |         |
| 12 | Allocation:                                                         |     |                                                                                                                                                                                                                                                                                                                                                                                                              |         |
| 13 |                                                                     |     |                                                                                                                                                                                                                                                                                                                                                                                                              |         |
| 14 | Sequence generation                                                 | 16a | Method of generating the allocation sequence (eg, computer-generated random numbers), and list of any factors for stratification. To reduce predictability of a random sequence, details of any planned restriction (eg, blocking) should be provided in a separate document that is unavailable to those who enrol participants or assign interventions                                                     | Page 5  |
| 15 |                                                                     |     |                                                                                                                                                                                                                                                                                                                                                                                                              |         |
| 16 |                                                                     |     |                                                                                                                                                                                                                                                                                                                                                                                                              |         |
| 17 |                                                                     |     |                                                                                                                                                                                                                                                                                                                                                                                                              |         |
| 18 |                                                                     |     |                                                                                                                                                                                                                                                                                                                                                                                                              |         |
| 19 |                                                                     |     |                                                                                                                                                                                                                                                                                                                                                                                                              |         |
| 20 |                                                                     |     |                                                                                                                                                                                                                                                                                                                                                                                                              |         |
| 21 |                                                                     |     |                                                                                                                                                                                                                                                                                                                                                                                                              |         |
| 22 |                                                                     |     |                                                                                                                                                                                                                                                                                                                                                                                                              |         |
| 23 |                                                                     |     |                                                                                                                                                                                                                                                                                                                                                                                                              |         |
| 24 | Allocation concealment mechanism                                    | 16b | Mechanism of implementing the allocation sequence (eg, central telephone; sequentially numbered, opaque, sealed envelopes), describing any steps to conceal the sequence until interventions are assigned                                                                                                                                                                                                    | Page 5  |
| 25 |                                                                     |     |                                                                                                                                                                                                                                                                                                                                                                                                              |         |
| 26 |                                                                     |     |                                                                                                                                                                                                                                                                                                                                                                                                              |         |
| 27 |                                                                     |     |                                                                                                                                                                                                                                                                                                                                                                                                              |         |
| 28 |                                                                     |     |                                                                                                                                                                                                                                                                                                                                                                                                              |         |
| 29 |                                                                     |     |                                                                                                                                                                                                                                                                                                                                                                                                              |         |
| 30 |                                                                     |     |                                                                                                                                                                                                                                                                                                                                                                                                              |         |
| 31 | Implementation                                                      | 16c | Who will generate the allocation sequence, who will enrol participants, and who will assign participants to interventions                                                                                                                                                                                                                                                                                    | Page 5  |
| 32 |                                                                     |     |                                                                                                                                                                                                                                                                                                                                                                                                              |         |
| 33 |                                                                     |     |                                                                                                                                                                                                                                                                                                                                                                                                              |         |
| 34 |                                                                     |     |                                                                                                                                                                                                                                                                                                                                                                                                              |         |
| 35 |                                                                     |     |                                                                                                                                                                                                                                                                                                                                                                                                              |         |
| 36 | Blinding (masking)                                                  | 17a | Who will be blinded after assignment to interventions (eg, trial participants, care providers, outcome assessors, data analysts), and how                                                                                                                                                                                                                                                                    | NA      |
| 37 |                                                                     |     |                                                                                                                                                                                                                                                                                                                                                                                                              |         |
| 38 |                                                                     |     |                                                                                                                                                                                                                                                                                                                                                                                                              |         |
| 39 |                                                                     |     |                                                                                                                                                                                                                                                                                                                                                                                                              |         |
| 40 |                                                                     | 17b | If blinded, circumstances under which unblinding is permissible, and procedure for revealing a participant's allocated intervention during the trial                                                                                                                                                                                                                                                         | NA      |
| 41 |                                                                     |     |                                                                                                                                                                                                                                                                                                                                                                                                              |         |
| 42 |                                                                     |     |                                                                                                                                                                                                                                                                                                                                                                                                              |         |
| 43 |                                                                     |     |                                                                                                                                                                                                                                                                                                                                                                                                              |         |
| 44 |                                                                     |     |                                                                                                                                                                                                                                                                                                                                                                                                              |         |
| 45 | <b>Methods: Data collection, management, and analysis</b>           |     |                                                                                                                                                                                                                                                                                                                                                                                                              |         |
| 46 |                                                                     |     |                                                                                                                                                                                                                                                                                                                                                                                                              |         |
| 47 | Data collection methods                                             | 18a | Plans for assessment and collection of outcome, baseline, and other trial data, including any related processes to promote data quality (eg, duplicate measurements, training of assessors) and a description of study instruments (eg, questionnaires, laboratory tests) along with their reliability and validity, if known. Reference to where data collection forms can be found, if not in the protocol | Page 12 |
| 48 |                                                                     |     |                                                                                                                                                                                                                                                                                                                                                                                                              |         |
| 49 |                                                                     |     |                                                                                                                                                                                                                                                                                                                                                                                                              |         |
| 50 |                                                                     |     |                                                                                                                                                                                                                                                                                                                                                                                                              |         |
| 51 |                                                                     |     |                                                                                                                                                                                                                                                                                                                                                                                                              |         |
| 52 |                                                                     |     |                                                                                                                                                                                                                                                                                                                                                                                                              |         |
| 53 |                                                                     |     |                                                                                                                                                                                                                                                                                                                                                                                                              |         |
| 54 |                                                                     |     |                                                                                                                                                                                                                                                                                                                                                                                                              |         |
| 55 |                                                                     |     |                                                                                                                                                                                                                                                                                                                                                                                                              |         |
| 56 |                                                                     |     |                                                                                                                                                                                                                                                                                                                                                                                                              |         |
| 57 |                                                                     |     |                                                                                                                                                                                                                                                                                                                                                                                                              |         |
| 58 |                                                                     |     |                                                                                                                                                                                                                                                                                                                                                                                                              |         |
| 59 |                                                                     |     |                                                                                                                                                                                                                                                                                                                                                                                                              |         |
| 60 |                                                                     |     |                                                                                                                                                                                                                                                                                                                                                                                                              |         |

|                                 |     |                                                                                                                                                                                                                                                                                                                                       |         |
|---------------------------------|-----|---------------------------------------------------------------------------------------------------------------------------------------------------------------------------------------------------------------------------------------------------------------------------------------------------------------------------------------|---------|
|                                 | 18b | Plans to promote participant retention and complete follow-up, including list of any outcome data to be collected for participants who discontinue or deviate from intervention protocols                                                                                                                                             | Page 13 |
| Data management                 | 19  | Plans for data entry, coding, security, and storage, including any related processes to promote data quality (eg, double data entry; range checks for data values). Reference to where details of data management procedures can be found, if not in the protocol                                                                     | Page 12 |
| Statistical methods             | 20a | Statistical methods for analysing primary and secondary outcomes. Reference to where other details of the statistical analysis plan can be found, if not in the protocol                                                                                                                                                              | Page 13 |
|                                 | 20b | Methods for any additional analyses (eg, subgroup and adjusted analyses)                                                                                                                                                                                                                                                              | NA      |
|                                 | 20c | Definition of analysis population relating to protocol non-adherence (eg, as randomised analysis), and any statistical methods to handle missing data (eg, multiple imputation)                                                                                                                                                       | Page 13 |
| <b>Methods: Monitoring</b>      |     |                                                                                                                                                                                                                                                                                                                                       |         |
| Data monitoring                 | 21a | Composition of data monitoring committee (DMC); summary of its role and reporting structure; statement of whether it is independent from the sponsor and competing interests; and reference to where further details about its charter can be found, if not in the protocol. Alternatively, an explanation of why a DMC is not needed |         |
|                                 | 21b | Description of any interim analyses and stopping guidelines, including who will have access to these interim results and make the final decision to terminate the trial                                                                                                                                                               | Page 13 |
| Harms                           | 22  | Plans for collecting, assessing, reporting, and managing solicited and spontaneously reported adverse events and other unintended effects of trial interventions or trial conduct                                                                                                                                                     | Page 13 |
| Auditing                        | 23  | Frequency and procedures for auditing trial conduct, if any, and whether the process will be independent from investigators and the sponsor                                                                                                                                                                                           | Page 13 |
| <b>Ethics and dissemination</b> |     |                                                                                                                                                                                                                                                                                                                                       |         |

|                                        |                               |     |                                                                                                                                                                                                                                                                                     |          |
|----------------------------------------|-------------------------------|-----|-------------------------------------------------------------------------------------------------------------------------------------------------------------------------------------------------------------------------------------------------------------------------------------|----------|
| 1<br>2<br>3<br>4<br>5                  | Research ethics approval      | 24  | Plans for seeking research ethics committee/institutional review board (REC/IRB) approval                                                                                                                                                                                           | Page 14  |
| 6<br>7<br>8<br>9<br>10<br>11           | Protocol amendments           | 25  | Plans for communicating important protocol modifications (eg, changes to eligibility criteria, outcomes, analyses) to relevant parties (eg, investigators, REC/IRBs, trial participants, trial registries, journals, regulators)                                                    | Page 17  |
| 12<br>13<br>14<br>15                   | Consent or assent             | 26a | Who will obtain informed consent or assent from potential trial participants or authorised surrogates, and how (see Item 32)                                                                                                                                                        | Page 7   |
| 16<br>17<br>18<br>19<br>20             |                               | 26b | Additional consent provisions for collection and use of participant data and biological specimens in ancillary studies, if applicable                                                                                                                                               | NA       |
| 21<br>22<br>23<br>24<br>25<br>26       | Confidentiality               | 27  | How personal information about potential and enrolled participants will be collected, shared, and maintained in order to protect confidentiality before, during, and after the trial                                                                                                | Page 7   |
| 27<br>28<br>29                         | Declaration of interests      | 28  | Financial and other competing interests for principal investigators for the overall trial and each study site                                                                                                                                                                       | Page 18  |
| 30<br>31<br>32<br>33                   | Access to data                | 29  | Statement of who will have access to the final trial dataset, and disclosure of contractual agreements that limit such access for investigators                                                                                                                                     | Page 18  |
| 34<br>35<br>36<br>37<br>38             | Ancillary and post-trial care | 30  | Provisions, if any, for ancillary and post-trial care, and for compensation to those who suffer harm from trial participation                                                                                                                                                       | Page 18  |
| 39<br>40<br>41<br>42<br>43<br>44<br>45 | Dissemination policy          | 31a | Plans for investigators and sponsor to communicate trial results to participants, healthcare professionals, the public, and other relevant groups (eg, via publication, reporting in results databases, or other data sharing arrangements), including any publication restrictions | Page 14  |
| 46<br>47<br>48                         |                               | 31b | Authorship eligibility guidelines and any intended use of professional writers                                                                                                                                                                                                      | NA       |
| 49<br>50<br>51<br>52                   |                               | 31c | Plans, if any, for granting public access to the full protocol, participant-level dataset, and statistical code                                                                                                                                                                     | NA       |
| 53                                     | <b>Appendices</b>             |     |                                                                                                                                                                                                                                                                                     |          |
| 54<br>55<br>56<br>57<br>58<br>59<br>60 | Informed consent materials    | 32  | Model consent form and other related documentation given to participants and authorised surrogates                                                                                                                                                                                  | Attached |



|                      |    |                                                                                                                                                                                                |    |
|----------------------|----|------------------------------------------------------------------------------------------------------------------------------------------------------------------------------------------------|----|
| Biological specimens | 33 | Plans for collection, laboratory evaluation, and storage of biological specimens for genetic or molecular analysis in the current trial and for future use in ancillary studies, if applicable | NA |
|----------------------|----|------------------------------------------------------------------------------------------------------------------------------------------------------------------------------------------------|----|

\*It is strongly recommended that this checklist be read in conjunction with the SPIRIT 2013 Explanation & Elaboration for important clarification on the items. Amendments to the protocol should be tracked and dated. The SPIRIT checklist is copyrighted by the SPIRIT Group under the Creative Commons "[Attribution-NonCommercial-NoDerivs 3.0 Unported](https://creativecommons.org/licenses/by-nc-nd/3.0/)" license.

For peer review only
